# Supplementary material for: Wildlife Population Dynamics in Human-Dominated Landscapes under Community-Based Conservation: The Example of Nakuru Wildlife Conservancy, Kenya
Source: PLoS One. 2017 Jan 19;12(1):e0169730. doi: 10.1371/journal.pone.0169730 (PMC5245813; doi:10.1371/journal.pone.0169730)
Supplement: S3 Data — The month and year in which the census was conducted and the total area covered by each survey in hectares and square kilometers. (XLS) [file pone.0169730.s003.xls]

## Sheet: S3Data
	Species	Date	Count	Area (Acres)	Area (km2)	Abundance
	Aardvark	2002-03-02	3	326940	1323.08	Common
	Aardvark	2002-09-02	26	365740	1480.1	Common
	Aardvark	2003-04-01	1	222150	899.01	Common
	Aardvark	2005-04-01	1	319890	1294.55	Common
	Aardvark	2005-10-01	1	320390	1296.57	Common
	Aardvark	2006-04-01	2	325078	1315.55	Common
	Aardvark	2007-05-01	5	326578	1321.62	Common
	Aardvark	2007-10-01	14	326578	1321.62	Common
	Aardvark	2008-04-01	13	326578	1321.62	Common
	Aardvark	2008-10-01	2	326578	1321.62	Common
	Aardvark	2009-05-01	11	326538	1321.45	Common
	Aardvark	2009-09-01	6	326578	1321.62	Common
	Aardvark	2010-04-01	12	326578	1321.62	Common
	Aardvark	2010-10-01	3	326578	1321.62	Common
	Aardvark	2011-05-01	2	326578	1321.62	Common
	Aardvark	2012-05-01	1	321538	1301.22	Common
	Aardvark	2012-10-01	0	321538	1301.22	Common
	Aardvark	2013-05-01	17	321538	1301.22	Common
	Aardvark	2013-05-01	17	321538	1301.22	Common
	Aardvark	2014-05-01	5	321538	1301.22	Common
	Aardvark	2014-10-01	0	321538	1301.22	Common
	Aardvark	2015-05-01	23	321538	1301.22	Common
	African hare	2002-03-02	245	326940	1323.08	Common
	African hare	2002-09-02	340	365740	1480.1	Common
	African hare	2003-04-01	60	222150	899.01	Common
	African hare	2003-10-01	163	271150	1097.31	Common
	African hare	2004-03-01	216	298890	1209.57	Common
	African hare	2004-09-01	314	315390	1276.34	Common
	African hare	2005-04-01	386	319890	1294.55	Common
	African hare	2005-10-01	265	320390	1296.57	Common
	African hare	2006-04-01	358	325078	1315.55	Common
	African hare	2006-09-01	265	326578	1321.62	Common
	African hare	2007-05-01	308	326578	1321.62	Common
	African hare	2007-10-01	458	326578	1321.62	Common
	African hare	2008-04-01	364	326578	1321.62	Common
	African hare	2008-10-01	424	326578	1321.62	Common
	African hare	2009-05-01	554	326538	1321.45	Common
	African hare	2009-09-01	472	326578	1321.62	Common
	African hare	2010-04-01	448	326578	1321.62	Common
	African hare	2010-10-01	400	326578	1321.62	Common
	African hare	2011-05-01	134	326578	1321.62	Common
	African hare	2011-11-01	23	221350	895.772	Common
	African hare	2012-05-01	73	321538	1301.22	Common
	African hare	2013-05-01	267	321538	1301.22	Common
	African hare	2014-05-01	283	321538	1301.22	Common
	Baboon	1996-03-01	449	283000	1145.26	Common
	Baboon	1996-09-01	1599	312300	1263.83	Common
	Baboon	1997-03-01	984	321800	1302.28	Common
	Baboon	1997-10-01	2142	461100	1866.01	Common
	Baboon	1998-03-01	1833	352300	1425.71	Common
	Baboon	1998-10-01	1573	354100	1432.99	Common
	Baboon	1999-04-01	1100	344940	1395.92	Common
	Baboon	1999-10-01	1019	346600	1402.64	Common
	Baboon	2000-04-01	1454	372640	1508.02	Common
	Baboon	2000-09-01	1297	325500	1317.25	Common
	Baboon	2001-01-01	1082	359100	1453.23	Common
	Baboon	2002-03-02	925	326940	1323.08	Common
	Baboon	2002-09-02	748	365740	1480.1	Common
	Baboon	2003-04-01	519	222150	899.01	Common
	Baboon	2003-10-01	1141	271150	1097.31	Common
	Baboon	2004-03-01	705	298890	1209.57	Common
	Baboon	2004-09-01	865	315390	1276.34	Common
	Baboon	2005-04-01	993	319890	1294.55	Common
	Baboon	2005-10-01	1020	320390	1296.57	Common
	Baboon	2006-04-01	1044	325078	1315.55	Common
	Baboon	2006-09-01	1476	326578	1321.62	Common
	Baboon	2007-05-01	1726	326578	1321.62	Common
	Baboon	2007-10-01	2159	326578	1321.62	Common
	Baboon	2008-04-01	1778	326578	1321.62	Common
	Baboon	2008-10-01	1774	326578	1321.62	Common
	Baboon	2009-05-01	1891	326538	1321.45	Common
	Baboon	2009-09-01	1247	326578	1321.62	Common
	Baboon	2010-04-01	1217	326578	1321.62	Common
	Baboon	2010-10-01	1028	326578	1321.62	Common
	Baboon	2011-05-01	1685	326578	1321.62	Common
	Baboon	2012-05-01	692	321538	1301.22	Common
	Baboon	2012-10-01	1348	321538	1301.22	Common
	Baboon	2013-05-01	1404	321538	1301.22	Common
	Baboon	2014-05-01	2142	321538	1301.22	Common
	Baboon	2014-10-01	1803	321538	1301.22	Common
	Baboon	2015-05-01	1611	321538	1301.22	Common
	Bat eared fox	1998-10-01	34	354100	1432.99	Common
	Bat eared fox	1999-04-01	54	344940	1395.92	Common
	Bat eared fox	1999-10-01	22	346600	1402.64	Common
	Bat eared fox	2000-04-01	165	372640	1508.02	Common
	Bat eared fox	2000-09-01	16	325500	1317.25	Common
	Bat eared fox	2001-01-01	62	359100	1453.23	Common
	Bat eared fox	2002-03-02	76	326940	1323.08	Common
	Bat eared fox	2002-09-02	28	365740	1480.1	Common
	Bat eared fox	2003-04-01	83	222150	899.01	Common
	Bat eared fox	2003-10-01	18	271150	1097.31	Common
	Bat eared fox	2004-03-01	42	298890	1209.57	Common
	Bat eared fox	2004-09-01	47	315390	1276.34	Common
	Bat eared fox	2005-04-01	70	319890	1294.55	Common
	Bat eared fox	2005-10-01	62	320390	1296.57	Common
	Bat eared fox	2006-04-01	51	325078	1315.55	Common
	Bat eared fox	2006-09-01	47	326578	1321.62	Common
	Bat eared fox	2007-05-01	46	326578	1321.62	Common
	Bat eared fox	2007-10-01	29	326578	1321.62	Common
	Bat eared fox	2008-04-01	605	326578	1321.62	Common
	Bat eared fox	2008-10-01	38	326578	1321.62	Common
	Bat eared fox	2009-05-01	42	326538	1321.45	Common
	Bat eared fox	2009-09-01	49	326578	1321.62	Common
	Bat eared fox	2010-04-01	55	326578	1321.62	Common
	Bat eared fox	2010-10-01	48	326578	1321.62	Common
	Bat eared fox	2011-05-01	37	326578	1321.62	Common
	Bat eared fox	2012-05-01	59	321538	1301.22	Common
	Bat eared fox	2013-05-01	125	321538	1301.22	Common
	Bat eared fox	2014-05-01	205	321538	1301.22	Common
	Buffalo	1996-03-01	1069	283000	1145.26	Common
	Buffalo	1996-09-01	2140	312300	1263.83	Common
	Buffalo	1997-03-01	1350	321800	1302.28	Common
	Buffalo	1997-10-01	2519	461100	1866.01	Common
	Buffalo	1998-03-01	2625	352300	1425.71	Common
	Buffalo	1998-10-01	2175	354100	1432.99	Common
	Buffalo	1999-04-01	2503	344940	1395.92	Common
	Buffalo	1999-10-01	1305	346600	1402.64	Common
	Buffalo	2000-04-01	2155	372640	1508.02	Common
	Buffalo	2000-09-01	1420	325500	1317.25	Common
	Buffalo	2001-01-01	1631	359100	1453.23	Common
	Buffalo	2002-03-02	2568	326940	1323.08	Common
	Buffalo	2002-09-02	2048	365740	1480.1	Common
	Buffalo	2003-04-01	1228	222150	899.01	Common
	Buffalo	2003-10-01	2882	271150	1097.31	Common
	Buffalo	2004-03-01	2480	298890	1209.57	Common
	Buffalo	2004-09-01	2893	315390	1276.34	Common
	Buffalo	2005-04-01	2218	319890	1294.55	Common
	Buffalo	2005-10-01	3870	320390	1296.57	Common
	Buffalo	2006-04-01	3730	325078	1315.55	Common
	Buffalo	2006-09-01	3331	326578	1321.62	Common
	Buffalo	2007-05-01	3474	326578	1321.62	Common
	Buffalo	2007-10-01	4039	326578	1321.62	Common
	Buffalo	2008-04-01	5722	326578	1321.62	Common
	Buffalo	2008-10-01	3488	326578	1321.62	Common
	Buffalo	2009-05-01	3416	326538	1321.45	Common
	Buffalo	2009-09-01	2756	326578	1321.62	Common
	Buffalo	2010-04-01	3582	326578	1321.62	Common
	Buffalo	2010-10-01	2628	326578	1321.62	Common
	Buffalo	2011-05-01	3686	326578	1321.62	Common
	Buffalo	2011-11-01	1508	221350	895.772	Common
	Buffalo	2012-05-01	3233	321538	1301.22	Common
	Buffalo	2012-10-01	1429	321538	1301.22	Common
	Buffalo	2013-05-01	3226	321538	1301.22	Common
	Buffalo	2014-05-01	3771	321538	1301.22	Common
	Buffalo	2014-10-01	3345	321538	1301.22	Common
	Buffalo	2015-05-01	2987	321538	1301.22	Common
	Bush baby	2012-05-01	12	321538	1301.22	Rare
	Bush baby	2013-05-01	8	321538	1301.22	Rare
	Bush baby	2014-05-01	9	321538	1301.22	Rare
	Bush baby	2015-05-01	23	321538	1301.22	Rare
	Bushbuck	1996-03-01	39	283000	1145.26	Common
	Bushbuck	1996-09-01	268	312300	1263.83	Common
	Bushbuck	1997-03-01	200	321800	1302.28	Common
	Bushbuck	1997-10-01	162	461100	1866.01	Common
	Bushbuck	1998-03-01	137	352300	1425.71	Common
	Bushbuck	1998-10-01	95	354100	1432.99	Common
	Bushbuck	1999-04-01	61	344940	1395.92	Common
	Bushbuck	1999-10-01	51	346600	1402.64	Common
	Bushbuck	2000-04-01	53	372640	1508.02	Common
	Bushbuck	2000-09-01	68	325500	1317.25	Common
	Bushbuck	2001-01-01	44	359100	1453.23	Common
	Bushbuck	2002-03-02	75	326940	1323.08	Common
	Bushbuck	2002-09-02	144	365740	1480.1	Common
	Bushbuck	2003-04-01	48	222150	899.01	Common
	Bushbuck	2003-10-01	36	271150	1097.31	Common
	Bushbuck	2004-03-01	39	298890	1209.57	Common
	Bushbuck	2004-09-01	25	315390	1276.34	Common
	Bushbuck	2005-04-01	16	319890	1294.55	Common
	Bushbuck	2005-10-01	45	320390	1296.57	Common
	Bushbuck	2006-04-01	29	325078	1315.55	Common
	Bushbuck	2006-09-01	76	326578	1321.62	Common
	Bushbuck	2007-05-01	51	326578	1321.62	Common
	Bushbuck	2007-10-01	45	326578	1321.62	Common
	Bushbuck	2008-04-01	50	326578	1321.62	Common
	Bushbuck	2008-10-01	52	326578	1321.62	Common
	Bushbuck	2009-05-01	48	326538	1321.45	Common
	Bushbuck	2009-09-01	49	326578	1321.62	Common
	Bushbuck	2010-04-01	105	326578	1321.62	Common
	Bushbuck	2010-10-01	57	326578	1321.62	Common
	Bushbuck	2011-05-01	36	326578	1321.62	Common
	Bushbuck	2011-11-01	12	221350	895.772	Common
	Bushbuck	2012-05-01	14	321538	1301.22	Common
	Bushpig	2002-03-02	18	326940	1323.08	Common
	Bushpig	2002-09-02	9	365740	1480.1	Common
	Bushpig	2004-03-01	4	298890	1209.57	Common
	Bushpig	2004-09-01	14	315390	1276.34	Common
	Bushpig	2005-04-01	16	319890	1294.55	Common
	Bushpig	2005-10-01	19	320390	1296.57	Common
	Bushpig	2006-04-01	16	325078	1315.55	Common
	Bushpig	2006-09-01	18	326578	1321.62	Common
	Bushpig	2007-05-01	15	326578	1321.62	Common
	Bushpig	2007-10-01	10	326578	1321.62	Common
	Bushpig	2008-04-01	16	326578	1321.62	Common
	Bushpig	2008-10-01	22	326578	1321.62	Common
	Bushpig	2009-05-01	15	326538	1321.45	Common
	Bushpig	2009-09-01	7	326578	1321.62	Common
	Bushpig	2010-04-01	24	326578	1321.62	Common
	Bushpig	2010-10-01	13	326578	1321.62	Common
	Bushpig	2012-05-01	9	321538	1301.22	Common
	Bushpig	2013-05-01	27	321538	1301.22	Common
	Bushpig	2014-05-01	22	321538	1301.22	Common
	Bushpig	2015-05-01	28	321538	1301.22	Common
	Cheetah	1996-03-01	6	283000	1145.26	Common
	Cheetah	1996-09-01	6	312300	1263.83	Common
	Cheetah	1997-03-01	1	321800	1302.28	Common
	Cheetah	1997-10-01	21	461100	1866.01	Common
	Cheetah	1998-03-01	5	352300	1425.71	Common
	Cheetah	1998-10-01	2	354100	1432.99	Common
	Cheetah	1999-04-01	9	344940	1395.92	Common
	Cheetah	1999-10-01	4	346600	1402.64	Common
	Cheetah	2000-04-01	3	372640	1508.02	Common
	Cheetah	2000-09-01	3	325500	1317.25	Common
	Cheetah	2001-01-01	8	359100	1453.23	Common
	Cheetah	2002-03-02	4	326940	1323.08	Common
	Cheetah	2002-09-02	2	365740	1480.1	Common
	Cheetah	2003-10-01	1	271150	1097.31	Common
	Cheetah	2004-09-01	2	315390	1276.34	Common
	Cheetah	2005-04-01	5	319890	1294.55	Common
	Cheetah	2005-10-01	6	320390	1296.57	Common
	Cheetah	2008-04-01	1	326578	1321.62	Common
	Cheetah	2009-09-01	2	326578	1321.62	Common
	Cheetah	2012-10-01	0	321538	1301.22	Common
	Cheetah	2013-05-01	0	321538	1301.22	Common
	Cheetah	2014-05-01	0	321538	1301.22	Common
	Cheetah	2014-10-01	0	321538	1301.22	Common
	Cheetah	2015-05-01	0	321538	1301.22	Common
	Colobus	1996-03-01	126	283000	1145.26	Common
	Colobus	1996-09-01	188	312300	1263.83	Common
	Colobus	1997-03-01	109	321800	1302.28	Common
	Colobus	1997-10-01	120	461100	1866.01	Common
	Colobus	1998-03-01	109	352300	1425.71	Common
	Colobus	1998-10-01	170	354100	1432.99	Common
	Colobus	1999-04-01	82	344940	1395.92	Common
	Colobus	1999-10-01	97	346600	1402.64	Common
	Colobus	2000-04-01	126	372640	1508.02	Common
	Colobus	2000-09-01	190	325500	1317.25	Common
	Colobus	2001-01-01	63	359100	1453.23	Common
	Colobus	2002-03-02	201	326940	1323.08	Common
	Colobus	2002-09-02	3	365740	1480.1	Common
	Colobus	2003-04-01	8	222150	899.01	Common
	Colobus	2003-10-01	156	271150	1097.31	Common
	Colobus	2004-03-01	113	298890	1209.57	Common
	Colobus	2004-09-01	117	315390	1276.34	Common
	Colobus	2005-04-01	88	319890	1294.55	Common
	Colobus	2005-10-01	127	320390	1296.57	Common
	Colobus	2006-04-01	67	325078	1315.55	Common
	Colobus	2006-09-01	86	326578	1321.62	Common
	Colobus	2007-05-01	101	326578	1321.62	Common
	Colobus	2007-10-01	90	326578	1321.62	Common
	Colobus	2008-04-01	131	326578	1321.62	Common
	Colobus	2008-10-01	32	326578	1321.62	Common
	Colobus	2009-05-01	142	326538	1321.45	Common
	Colobus	2009-09-01	97	326578	1321.62	Common
	Colobus	2010-04-01	84	326578	1321.62	Common
	Colobus	2010-10-01	126	326578	1321.62	Common
	Colobus	2011-05-01	151	326578	1321.62	Common
	Colobus	2012-05-01	92	321538	1301.22	Common
	Colobus	2012-10-01	95	321538	1301.22	Common
	Colobus	2013-05-01	193	321538	1301.22	Common
	Colobus	2014-05-01	93	321538	1301.22	Common
	Colobus	2014-10-01	187	321538	1301.22	Common
	Colobus	2015-05-01	139	321538	1301.22	Common
	Dik dik	1996-03-01	382	283000	1145.26	Common
	Dik dik	1996-09-01	1007	312300	1263.83	Common
	Dik dik	1997-03-01	783	321800	1302.28	Common
	Dik dik	1997-10-01	963	461100	1866.01	Common
	Dik dik	1998-03-01	882	352300	1425.71	Common
	Dik dik	1998-10-01	655	354100	1432.99	Common
	Dik dik	1999-04-01	614	344940	1395.92	Common
	Dik dik	1999-10-01	486	346600	1402.64	Common
	Dik dik	2000-04-01	680	372640	1508.02	Common
	Dik dik	2000-09-01	858	325500	1317.25	Common
	Dik dik	2001-01-01	747	359100	1453.23	Common
	Dik dik	2002-03-02	758	326940	1323.08	Common
	Dik dik	2002-09-02	772	365740	1480.1	Common
	Dik dik	2003-04-01	488	222150	899.01	Common
	Dik dik	2003-10-01	667	271150	1097.31	Common
	Dik dik	2004-03-01	742	298890	1209.57	Common
	Dik dik	2004-09-01	499	315390	1276.34	Common
	Dik dik	2005-04-01	767	319890	1294.55	Common
	Dik dik	2005-10-01	748	320390	1296.57	Common
	Dik dik	2006-04-01	692	325078	1315.55	Common
	Dik dik	2006-09-01	846	326578	1321.62	Common
	Dik dik	2007-05-01	792	326578	1321.62	Common
	Dik dik	2007-10-01	1005	326578	1321.62	Common
	Dik dik	2008-04-01	816	326578	1321.62	Common
	Dik dik	2008-10-01	803	326578	1321.62	Common
	Dik dik	2009-05-01	1407	326538	1321.45	Common
	Dik dik	2009-09-01	851	326578	1321.62	Common
	Dik dik	2010-04-01	1194	326578	1321.62	Common
	Dik dik	2010-10-01	820	326578	1321.62	Common
	Dik dik	2011-05-01	698	326578	1321.62	Common
	Dik dik	2011-11-01	439	221350	895.772	Common
	Dik dik	2012-05-01	531	321538	1301.22	Common
	Dik dik	2012-10-01	623	321538	1301.22	Common
	Dik dik	2013-05-01	569	321538	1301.22	Common
	Dik dik	2014-05-01	734	321538	1301.22	Common
	Dik dik	2014-10-01	612	321538	1301.22	Common
	Dik dik	2015-05-01	757	321538	1301.22	Common
	Duiker	1996-03-01	11	283000	1145.26	Common
	Duiker	1996-09-01	46	312300	1263.83	Common
	Duiker	1997-03-01	58	321800	1302.28	Common
	Duiker	1997-10-01	78	461100	1866.01	Common
	Duiker	1998-03-01	71	352300	1425.71	Common
	Duiker	1998-10-01	25	354100	1432.99	Common
	Duiker	1999-04-01	52	344940	1395.92	Common
	Duiker	1999-10-01	49	346600	1402.64	Common
	Duiker	2000-04-01	65	372640	1508.02	Common
	Duiker	2000-09-01	71	325500	1317.25	Common
	Duiker	2001-01-01	68	359100	1453.23	Common
	Duiker	2002-03-02	28	326940	1323.08	Common
	Duiker	2002-09-02	36	365740	1480.1	Common
	Duiker	2003-04-01	37	222150	899.01	Common
	Duiker	2003-10-01	34	271150	1097.31	Common
	Duiker	2004-03-01	34	298890	1209.57	Common
	Duiker	2004-09-01	94	315390	1276.34	Common
	Duiker	2005-04-01	106	319890	1294.55	Common
	Duiker	2005-10-01	36	320390	1296.57	Common
	Duiker	2006-04-01	42	325078	1315.55	Common
	Duiker	2006-09-01	35	326578	1321.62	Common
	Duiker	2007-05-01	33	326578	1321.62	Common
	Duiker	2007-10-01	59	326578	1321.62	Common
	Duiker	2008-04-01	64	326578	1321.62	Common
	Duiker	2008-10-01	26	326578	1321.62	Common
	Duiker	2009-05-01	55	326538	1321.45	Common
	Duiker	2009-09-01	38	326578	1321.62	Common
	Duiker	2010-04-01	26	326578	1321.62	Common
	Duiker	2010-10-01	16	326578	1321.62	Common
	Duiker	2011-05-01	29	326578	1321.62	Common
	Duiker	2011-11-01	59	221350	895.772	Common
	Duiker	2012-05-01	10	321538	1301.22	Common
	Duiker	2012-10-01	22	321538	1301.22	Common
	Duiker	2013-05-01	22	321538	1301.22	Common
	Duiker	2014-05-01	19	321538	1301.22	Common
	Duiker	2014-10-01	17	321538	1301.22	Common
	Duiker	2015-05-01	13	321538	1301.22	Common
	Eland	1996-03-01	1863	283000	1145.26	Common
	Eland	1996-09-01	2329	312300	1263.83	Common
	Eland	1997-03-01	1142	321800	1302.28	Common
	Eland	1997-10-01	4155	461100	1866.01	Common
	Eland	1998-03-01	2550	352300	1425.71	Common
	Eland	1998-10-01	2338	354100	1432.99	Common
	Eland	1999-04-01	2062	344940	1395.92	Common
	Eland	1999-10-01	999	346600	1402.64	Common
	Eland	2000-04-01	1722	372640	1508.02	Common
	Eland	2000-09-01	1802	325500	1317.25	Common
	Eland	2001-01-01	3310	359100	1453.23	Common
	Eland	2002-03-02	2710	326940	1323.08	Common
	Eland	2002-09-02	1601	365740	1480.1	Common
	Eland	2003-04-01	1718	222150	899.01	Common
	Eland	2003-10-01	2325	271150	1097.31	Common
	Eland	2004-03-01	1688	298890	1209.57	Common
	Eland	2004-09-01	1918	315390	1276.34	Common
	Eland	2005-04-01	2290	319890	1294.55	Common
	Eland	2005-10-01	2875	320390	1296.57	Common
	Eland	2006-04-01	2758	325078	1315.55	Common
	Eland	2006-09-01	1894	326578	1321.62	Common
	Eland	2007-05-01	2847	326578	1321.62	Common
	Eland	2007-10-01	2306	326578	1321.62	Common
	Eland	2008-04-01	2115	326578	1321.62	Common
	Eland	2008-10-01	3182	326578	1321.62	Common
	Eland	2009-05-01	1751	326538	1321.45	Common
	Eland	2009-09-01	1682	326578	1321.62	Common
	Eland	2010-04-01	2536	326578	1321.62	Common
	Eland	2010-10-01	1998	326578	1321.62	Common
	Eland	2011-05-01	2043	326578	1321.62	Common
	Eland	2011-11-01	1007	221350	895.772	Common
	Eland	2012-05-01	1696	321538	1301.22	Common
	Eland	2012-10-01	1097	321538	1301.22	Common
	Eland	2013-05-01	2922	321538	1301.22	Common
	Eland	2014-05-01	2220	321538	1301.22	Common
	Eland	2014-10-01	2230	321538	1301.22	Common
	Eland	2015-05-01	2253	321538	1301.22	Common
	Genet	2003-10-01	3	271150	1097.31	Rare
	Genet	2010-10-01	12	326578	1321.62	Rare
	Genet	2011-05-01	5	326578	1321.62	Rare
	Genet	2013-05-01	0	321538	1301.22	Rare
	Genet	2014-05-01	0	321538	1301.22	Rare
	Genet	2015-05-01	0	321538	1301.22	Rare
	Gerenuk	2007-10-01	1	326578	1321.62	Rare
	Gerenuk	2008-04-01	1	326578	1321.62	Rare
	Gerenuk	2008-10-01	1	326578	1321.62	Rare
	Gerenuk	2009-05-01	1	326538	1321.45	Rare
	Gerenuk	2009-09-01	1	326578	1321.62	Rare
	Gerenuk	2010-04-01	1	326578	1321.62	Rare
	Gerenuk	2010-10-01	1	326578	1321.62	Rare
	Gerenuk	2011-05-01	1	326578	1321.62	Rare
	Gerenuk	2011-11-01	1	221350	895.772	Rare
	Gerenuk	2012-05-01	4	321538	1301.22	Rare
	Gerenuk	2012-10-01	0	321538	1301.22	Rare
	Gerenuk	2013-05-01	34	321538	1301.22	Rare
	Gerenuk	2014-05-01	0	321538	1301.22	Rare
	Gerenuk	2014-10-01	0	321538	1301.22	Rare
	Gerenuk	2015-05-01	0	321538	1301.22	Rare
	Giraffe	1996-03-01	195	283000	1145.26	Common
	Giraffe	1996-09-01	412	312300	1263.83	Common
	Giraffe	1997-03-01	176	321800	1302.28	Common
	Giraffe	1997-10-01	208	461100	1866.01	Common
	Giraffe	1998-03-01	285	352300	1425.71	Common
	Giraffe	1998-10-01	436	354100	1432.99	Common
	Giraffe	1999-04-01	428	344940	1395.92	Common
	Giraffe	1999-10-01	151	346600	1402.64	Common
	Giraffe	2000-04-01	321	372640	1508.02	Common
	Giraffe	2000-09-01	519	325500	1317.25	Common
	Giraffe	2001-01-01	497	359100	1453.23	Common
	Giraffe	2002-03-02	507	326940	1323.08	Common
	Giraffe	2002-09-02	480	365740	1480.1	Common
	Giraffe	2003-04-01	425	222150	899.01	Common
	Giraffe	2003-10-01	475	271150	1097.31	Common
	Giraffe	2004-03-01	459	298890	1209.57	Common
	Giraffe	2004-09-01	481	315390	1276.34	Common
	Giraffe	2005-04-01	563	319890	1294.55	Common
	Giraffe	2005-10-01	726	320390	1296.57	Common
	Giraffe	2006-04-01	661	325078	1315.55	Common
	Giraffe	2006-09-01	690	326578	1321.62	Common
	Giraffe	2007-05-01	666	326578	1321.62	Common
	Giraffe	2007-10-01	852	326578	1321.62	Common
	Giraffe	2008-04-01	587	326578	1321.62	Common
	Giraffe	2008-10-01	1114	326578	1321.62	Common
	Giraffe	2009-05-01	618	326538	1321.45	Common
	Giraffe	2009-09-01	679	326578	1321.62	Common
	Giraffe	2010-04-01	529	326578	1321.62	Common
	Giraffe	2010-10-01	732	326578	1321.62	Common
	Giraffe	2011-05-01	903	326578	1321.62	Common
	Giraffe	2011-11-01	946	221350	895.772	Common
	Giraffe	2012-05-01	1045	321538	1301.22	Common
	Giraffe	2012-10-01	853	321538	1301.22	Common
	Giraffe	2013-05-01	1037	321538	1301.22	Common
	Giraffe	2014-05-01	909	321538	1301.22	Common
	Giraffe	2014-10-01	881	321538	1301.22	Common
	Giraffe	2015-05-01	914	321538	1301.22	Common
	Grant's gazelle	1996-03-01	1478	283000	1145.26	Common
	Grant's gazelle	1996-09-01	2444	312300	1263.83	Common
	Grant's gazelle	1997-03-01	1004	321800	1302.28	Common
	Grant's gazelle	1997-10-01	5367	461100	1866.01	Common
	Grant's gazelle	1998-03-01	2157	352300	1425.71	Common
	Grant's gazelle	1998-10-01	1287	354100	1432.99	Common
	Grant's gazelle	1999-04-01	2070	344940	1395.92	Common
	Grant's gazelle	1999-10-01	1231	346600	1402.64	Common
	Grant's gazelle	2000-04-01	2139	372640	1508.02	Common
	Grant's gazelle	2000-09-01	1372	325500	1317.25	Common
	Grant's gazelle	2001-01-01	3188	359100	1453.23	Common
	Grant's gazelle	2002-03-02	1806	326940	1323.08	Common
	Grant's gazelle	2002-09-02	1412	365740	1480.1	Common
	Grant's gazelle	2003-04-01	1270	222150	899.01	Common
	Grant's gazelle	2003-10-01	2597	271150	1097.31	Common
	Grant's gazelle	2004-03-01	2348	298890	1209.57	Common
	Grant's gazelle	2004-09-01	2283	315390	1276.34	Common
	Grant's gazelle	2005-04-01	1783	319890	1294.55	Common
	Grant's gazelle	2005-10-01	2976	320390	1296.57	Common
	Grant's gazelle	2006-04-01	1926	325078	1315.55	Common
	Grant's gazelle	2006-09-01	2012	326578	1321.62	Common
	Grant's gazelle	2007-05-01	2122	326578	1321.62	Common
	Grant's gazelle	2007-10-01	2707	326578	1321.62	Common
	Grant's gazelle	2008-04-01	1467	326578	1321.62	Common
	Grant's gazelle	2008-10-01	2094	326578	1321.62	Common
	Grant's gazelle	2009-05-01	1688	326538	1321.45	Common
	Grant's gazelle	2009-09-01	1281	326578	1321.62	Common
	Grant's gazelle	2010-04-01	1646	326578	1321.62	Common
	Grant's gazelle	2010-10-01	2181	326578	1321.62	Common
	Grant's gazelle	2011-05-01	1822	326578	1321.62	Common
	Grant's gazelle	2011-11-01	2443	221350	895.772	Common
	Grant's gazelle	2012-05-01	1917	321538	1301.22	Common
	Grant's gazelle	2012-10-01	1438	321538	1301.22	Common
	Grant's gazelle	2013-05-01	2722	321538	1301.22	Common
	Grant's gazelle	2014-05-01	2458	321538	1301.22	Common
	Grant's gazelle	2014-10-01	2880	321538	1301.22	Common
	Grant's gazelle	2015-05-01	1756	321538	1301.22	Common
	Greater kudu	2002-03-02	6	326940	1323.08	Rare
	Greater kudu	2002-09-02	0	365740	1480.1	Rare
	Greater kudu	2003-10-01	3	271150	1097.31	Rare
	Greater kudu	2004-03-01	3	298890	1209.57	Rare
	Greater kudu	2004-09-01	2	315390	1276.34	Rare
	Greater kudu	2005-04-01	1	319890	1294.55	Rare
	Greater kudu	2006-04-01	2	325078	1315.55	Rare
	Greater kudu	2007-05-01	2	326578	1321.62	Rare
	Greater kudu	2008-04-01	2	326578	1321.62	Rare
	Greater kudu	2008-10-01	2	326578	1321.62	Rare
	Greater kudu	2011-11-01	7	221350	895.772	Rare
	Greater kudu	2012-05-01	1	321538	1301.22	Rare
	Greater kudu	2012-10-01	2	321538	1301.22	Rare
	Greater kudu	2013-05-01	3	321538	1301.22	Rare
	Greater kudu	2014-05-01	0	321538	1301.22	Rare
	Greater kudu	2014-10-01	0	321538	1301.22	Rare
	Greater kudu	2015-05-01	0	321538	1301.22	Rare
	Grevy's zebra	2003-10-01	12	271150	1097.31	Common
	Grevy's zebra	2004-03-01	12	298890	1209.57	Common
	Grevy's zebra	2004-09-01	13	315390	1276.34	Common
	Grevy's zebra	2005-04-01	32	319890	1294.55	Common
	Grevy's zebra	2005-10-01	34	320390	1296.57	Common
	Grevy's zebra	2006-04-01	15	325078	1315.55	Common
	Grevy's zebra	2006-09-01	15	326578	1321.62	Common
	Grevy's zebra	2007-05-01	16	326578	1321.62	Common
	Grevy's zebra	2007-10-01	23	326578	1321.62	Common
	Grevy's zebra	2008-04-01	14	326578	1321.62	Common
	Grevy's zebra	2008-10-01	16	326578	1321.62	Common
	Grevy's zebra	2009-05-01	16	326538	1321.45	Common
	Grevy's zebra	2009-09-01	4	326578	1321.62	Common
	Grevy's zebra	2010-04-01	11	326578	1321.62	Common
	Grevy's zebra	2010-10-01	11	326578	1321.62	Common
	Grevy's zebra	2011-05-01	11	326578	1321.62	Common
	Grevy's zebra	2011-11-01	11	221350	895.772	Common
	Grevy's zebra	2012-05-01	20	321538	1301.22	Common
	Grevy's zebra	2012-10-01	13	321538	1301.22	Common
	Grevy's zebra	2013-05-01	94	321538	1301.22	Common
	Grevy's zebra	2014-05-01	16	321538	1301.22	Common
	Grevy's zebra	2014-10-01	28	321538	1301.22	Common
	Grevy's zebra	2015-05-01	6	321538	1301.22	Common
	Guinea fowl	1996-03-01	126	283000	1145.26	Common
	Guinea fowl	1996-09-01	201	312300	1263.83	Common
	Guinea fowl	1997-03-01	214	321800	1302.28	Common
	Guinea fowl	1997-10-01	250	461100	1866.01	Common
	Guinea fowl	1998-03-01	326	352300	1425.71	Common
	Guinea fowl	1998-10-01	552	354100	1432.99	Common
	Guinea fowl	1999-04-01	189	344940	1395.92	Common
	Guinea fowl	1999-10-01	154	346600	1402.64	Common
	Guinea fowl	2000-04-01	444	372640	1508.02	Common
	Guinea fowl	2000-09-01	330	325500	1317.25	Common
	Guinea fowl	2001-01-01	430	359100	1453.23	Common
	Guinea fowl	2002-03-02	233	326940	1323.08	Common
	Guinea fowl	2002-09-02	411	365740	1480.1	Common
	Guinea fowl	2003-04-01	612	222150	899.01	Common
	Guinea fowl	2003-10-01	291	271150	1097.31	Common
	Guinea fowl	2004-03-01	313	298890	1209.57	Common
	Guinea fowl	2004-09-01	165	315390	1276.34	Common
	Guinea fowl	2005-04-01	465	319890	1294.55	Common
	Guinea fowl	2005-10-01	182	320390	1296.57	Common
	Guinea fowl	2006-04-01	268	325078	1315.55	Common
	Guinea fowl	2006-09-01	720	326578	1321.62	Common
	Guinea fowl	2007-05-01	453	326578	1321.62	Common
	Guinea fowl	2007-10-01	490	326578	1321.62	Common
	Guinea fowl	2008-04-01	691	326578	1321.62	Common
	Guinea fowl	2008-10-01	775	326578	1321.62	Common
	Guinea fowl	2009-05-01	72	326538	1321.45	Common
	Guinea fowl	2009-09-01	290	326578	1321.62	Common
	Guinea fowl	2010-04-01	300	326578	1321.62	Common
	Guinea fowl	2010-10-01	339	326578	1321.62	Common
	Guinea fowl	2011-05-01	1408	326578	1321.62	Common
	Guinea fowl	2012-05-01	1321	321538	1301.22	Common
	Guinea fowl	2012-10-01	2142	321538	1301.22	Common
	Guinea fowl	2013-05-01	947	321538	1301.22	Common
	Guinea fowl	2014-05-01	1537	321538	1301.22	Common
	Guinea fowl	2014-10-01	2056	321538	1301.22	Common
	Guinea fowl	2015-05-01	890	321538	1301.22	Common
	Hippopotamus	1996-03-01	67	283000	1145.26	Common
	Hippopotamus	1996-09-01	328	312300	1263.83	Common
	Hippopotamus	1997-03-01	176	321800	1302.28	Common
	Hippopotamus	1997-10-01	213	461100	1866.01	Common
	Hippopotamus	1998-03-01	148	352300	1425.71	Common
	Hippopotamus	1998-10-01	109	354100	1432.99	Common
	Hippopotamus	1999-04-01	180	344940	1395.92	Common
	Hippopotamus	1999-10-01	186	346600	1402.64	Common
	Hippopotamus	2000-04-01	133	372640	1508.02	Common
	Hippopotamus	2000-09-01	260	325500	1317.25	Common
	Hippopotamus	2001-01-01	193	359100	1453.23	Common
	Hippopotamus	2002-03-02	349	326940	1323.08	Common
	Hippopotamus	2002-09-02	142	365740	1480.1	Common
	Hippopotamus	2003-04-01	337	222150	899.01	Common
	Hippopotamus	2003-10-01	348	271150	1097.31	Common
	Hippopotamus	2004-03-01	259	298890	1209.57	Common
	Hippopotamus	2004-09-01	269	315390	1276.34	Common
	Hippopotamus	2005-04-01	1559	319890	1294.55	Common
	Hippopotamus	2005-10-01	1647	320390	1296.57	Common
	Hippopotamus	2006-04-01	1029	325078	1315.55	Common
	Hippopotamus	2006-09-01	1114	326578	1321.62	Common
	Hippopotamus	2007-05-01	905	326578	1321.62	Common
	Hippopotamus	2007-10-01	938	326578	1321.62	Common
	Hippopotamus	2008-04-01	932	326578	1321.62	Common
	Hippopotamus	2008-10-01	1012	326578	1321.62	Common
	Hippopotamus	2009-05-01	1386	326538	1321.45	Common
	Hippopotamus	2009-09-01	2057	326578	1321.62	Common
	Hippopotamus	2010-04-01	1269	326578	1321.62	Common
	Hippopotamus	2010-10-01	1734	326578	1321.62	Common
	Hippopotamus	2011-05-01	1392	326578	1321.62	Common
	Hippopotamus	2011-11-01	221	221350	895.772	Common
	Hippopotamus	2012-05-01	375	321538	1301.22	Common
	Hippopotamus	2012-10-01	260	321538	1301.22	Common
	Hippopotamus	2013-05-01	450	321538	1301.22	Common
	Hippopotamus	2014-05-01	484	321538	1301.22	Common
	Hippopotamus	2014-10-01	396	321538	1301.22	Common
	Hippopotamus	2015-05-01	272	321538	1301.22	Common
	Hyena	1996-03-01	43	283000	1145.26	Common
	Hyena	1996-09-01	106	312300	1263.83	Common
	Hyena	1997-03-01	40	321800	1302.28	Common
	Hyena	1997-10-01	135	461100	1866.01	Common
	Hyena	1998-03-01	44	352300	1425.71	Common
	Hyena	1998-10-01	30	354100	1432.99	Common
	Hyena	1999-04-01	42	344940	1395.92	Common
	Hyena	1999-10-01	3	346600	1402.64	Common
	Hyena	2000-04-01	52	372640	1508.02	Common
	Hyena	2000-09-01	54	325500	1317.25	Common
	Hyena	2001-01-01	81	359100	1453.23	Common
	Hyena	2002-03-02	27	326940	1323.08	Common
	Hyena	2002-09-02	29	365740	1480.1	Common
	Hyena	2003-04-01	39	222150	899.01	Common
	Hyena	2003-10-01	10	271150	1097.31	Common
	Hyena	2004-03-01	16	298890	1209.57	Common
	Hyena	2004-09-01	15	315390	1276.34	Common
	Hyena	2005-04-01	64	319890	1294.55	Common
	Hyena	2005-10-01	26	320390	1296.57	Common
	Hyena	2006-04-01	23	325078	1315.55	Common
	Hyena	2006-09-01	19	326578	1321.62	Common
	Hyena	2007-05-01	39	326578	1321.62	Common
	Hyena	2007-10-01	79	326578	1321.62	Common
	Hyena	2008-04-01	55	326578	1321.62	Common
	Hyena	2008-10-01	50	326578	1321.62	Common
	Hyena	2009-05-01	63	326538	1321.45	Common
	Hyena	2009-09-01	45	326578	1321.62	Common
	Hyena	2010-04-01	49	326578	1321.62	Common
	Hyena	2010-10-01	56	326578	1321.62	Common
	Hyena	2011-05-01	75	326578	1321.62	Common
	Hyena	2012-05-01	62	321538	1301.22	Common
	Hyena	2012-10-01	24	321538	1301.22	Common
	Hyena	2013-05-01	71	321538	1301.22	Common
	Hyena	2014-05-01	152	321538	1301.22	Common
	Hyena	2014-10-01	141	321538	1301.22	Common
	Hyena	2015-05-01	92	321538	1301.22	Common
	Hyrax	2002-03-02	186	326940	1323.08	Common
	Hyrax	2002-09-02	273	365740	1480.1	Common
	Hyrax	2003-10-01	229	271150	1097.31	Common
	Hyrax	2004-03-01	129	298890	1209.57	Common
	Hyrax	2004-09-01	232	315390	1276.34	Common
	Hyrax	2005-04-01	296	319890	1294.55	Common
	Hyrax	2005-10-01	338	320390	1296.57	Common
	Hyrax	2006-04-01	3	325078	1315.55	Common
	Hyrax	2006-09-01	8	326578	1321.62	Common
	Hyrax	2007-05-01	163	326578	1321.62	Common
	Hyrax	2007-10-01	270	326578	1321.62	Common
	Hyrax	2008-04-01	220	326578	1321.62	Common
	Hyrax	2008-10-01	214	326578	1321.62	Common
	Hyrax	2009-05-01	1096	326538	1321.45	Common
	Hyrax	2009-09-01	565	326578	1321.62	Common
	Hyrax	2010-04-01	417	326578	1321.62	Common
	Hyrax	2010-10-01	542	326578	1321.62	Common
	Hyrax	2011-05-01	847	326578	1321.62	Common
	Hyrax	2011-11-01	27	221350	895.772	Common
	Hyrax	2012-05-01	106	321538	1301.22	Common
	Impala	1996-03-01	3431	283000	1145.26	Common
	Impala	1996-09-01	8887	312300	1263.83	Common
	Impala	1997-03-01	4493	321800	1302.28	Common
	Impala	1997-10-01	9205	461100	1866.01	Common
	Impala	1998-03-01	7232	352300	1425.71	Common
	Impala	1998-10-01	6987	354100	1432.99	Common
	Impala	1999-04-01	6163	344940	1395.92	Common
	Impala	1999-10-01	4852	346600	1402.64	Common
	Impala	2000-04-01	6352	372640	1508.02	Common
	Impala	2000-09-01	5667	325500	1317.25	Common
	Impala	2001-01-01	8153	359100	1453.23	Common
	Impala	2002-03-02	8021	326940	1323.08	Common
	Impala	2002-09-02	6750	365740	1480.1	Common
	Impala	2003-04-01	6668	222150	899.01	Common
	Impala	2003-10-01	8801	271150	1097.31	Common
	Impala	2004-03-01	9509	298890	1209.57	Common
	Impala	2004-09-01	8859	315390	1276.34	Common
	Impala	2005-04-01	8900	319890	1294.55	Common
	Impala	2005-10-01	11242	320390	1296.57	Common
	Impala	2006-04-01	10441	325078	1315.55	Common
	Impala	2006-09-01	10090	326578	1321.62	Common
	Impala	2007-05-01	12673	326578	1321.62	Common
	Impala	2007-10-01	12108	326578	1321.62	Common
	Impala	2008-04-01	13095	326578	1321.62	Common
	Impala	2008-10-01	13073	326578	1321.62	Common
	Impala	2009-05-01	12577	326538	1321.45	Common
	Impala	2009-09-01	11714	326578	1321.62	Common
	Impala	2010-04-01	11274	326578	1321.62	Common
	Impala	2010-10-01	12302	326578	1321.62	Common
	Impala	2011-05-01	11265	326578	1321.62	Common
	Impala	2011-11-01	5315	221350	895.772	Common
	Impala	2012-05-01	10167	321538	1301.22	Common
	Impala	2012-10-01	6473	321538	1301.22	Common
	Impala	2013-05-01	12107	321538	1301.22	Common
	Impala	2014-05-01	13452	321538	1301.22	Common
	Impala	2014-10-01	11824	321538	1301.22	Common
	Impala	2015-05-01	12219	321538	1301.22	Common
	Jackal	1996-03-01	70	283000	1145.26	Common
	Jackal	1996-09-01	148	312300	1263.83	Common
	Jackal	1997-03-01	100	321800	1302.28	Common
	Jackal	1997-10-01	427	461100	1866.01	Common
	Jackal	1998-03-01	172	352300	1425.71	Common
	Jackal	1998-10-01	97	354100	1432.99	Common
	Jackal	1999-04-01	135	344940	1395.92	Common
	Jackal	1999-10-01	93	346600	1402.64	Common
	Jackal	2000-04-01	192	372640	1508.02	Common
	Jackal	2000-09-01	209	325500	1317.25	Common
	Jackal	2001-01-01	157	359100	1453.23	Common
	Jackal	2002-03-02	206	326940	1323.08	Common
	Jackal	2002-09-02	159	365740	1480.1	Common
	Jackal	2003-04-01	152	222150	899.01	Common
	Jackal	2003-10-01	237	271150	1097.31	Common
	Jackal	2004-03-01	287	298890	1209.57	Common
	Jackal	2004-09-01	174	315390	1276.34	Common
	Jackal	2005-04-01	199	319890	1294.55	Common
	Jackal	2005-10-01	186	320390	1296.57	Common
	Jackal	2006-04-01	133	325078	1315.55	Common
	Jackal	2006-09-01	184	326578	1321.62	Common
	Jackal	2007-05-01	127	326578	1321.62	Common
	Jackal	2007-10-01	275	326578	1321.62	Common
	Jackal	2008-04-01	304	326578	1321.62	Common
	Jackal	2008-10-01	233	326578	1321.62	Common
	Jackal	2009-05-01	211	326538	1321.45	Common
	Jackal	2009-09-01	172	326578	1321.62	Common
	Jackal	2010-04-01	163	326578	1321.62	Common
	Jackal	2010-10-01	165	326578	1321.62	Common
	Jackal	2011-05-01	173	326578	1321.62	Common
	Jackal	2012-05-01	130	321538	1301.22	Common
	Klipspringer	1996-03-01	10	283000	1145.26	Common
	Klipspringer	1996-09-01	24	312300	1263.83	Common
	Klipspringer	1997-03-01	21	321800	1302.28	Common
	Klipspringer	1997-10-01	56	461100	1866.01	Common
	Klipspringer	1998-03-01	19	352300	1425.71	Common
	Klipspringer	1998-10-01	37	354100	1432.99	Common
	Klipspringer	1999-04-01	33	344940	1395.92	Common
	Klipspringer	1999-10-01	32	346600	1402.64	Common
	Klipspringer	2000-04-01	48	372640	1508.02	Common
	Klipspringer	2000-09-01	31	325500	1317.25	Common
	Klipspringer	2001-01-01	19	359100	1453.23	Common
	Klipspringer	2002-03-02	24	326940	1323.08	Common
	Klipspringer	2002-09-02	41	365740	1480.1	Common
	Klipspringer	2003-04-01	19	222150	899.01	Common
	Klipspringer	2003-10-01	14	271150	1097.31	Common
	Klipspringer	2004-03-01	14	298890	1209.57	Common
	Klipspringer	2004-09-01	5	315390	1276.34	Common
	Klipspringer	2005-04-01	12	319890	1294.55	Common
	Klipspringer	2005-10-01	10	320390	1296.57	Common
	Klipspringer	2006-04-01	5	325078	1315.55	Common
	Klipspringer	2006-09-01	4	326578	1321.62	Common
	Klipspringer	2007-05-01	13	326578	1321.62	Common
	Klipspringer	2007-10-01	4	326578	1321.62	Common
	Klipspringer	2008-04-01	24	326578	1321.62	Common
	Klipspringer	2008-10-01	7	326578	1321.62	Common
	Klipspringer	2009-05-01	18	326538	1321.45	Common
	Klipspringer	2009-09-01	15	326578	1321.62	Common
	Klipspringer	2010-04-01	14	326578	1321.62	Common
	Klipspringer	2010-10-01	4	326578	1321.62	Common
	Klipspringer	2011-05-01	8	326578	1321.62	Common
	Klipspringer	2011-11-01	14	221350	895.772	Common
	Klipspringer	2012-05-01	2	321538	1301.22	Common
	Klipspringer	2012-10-01	6	321538	1301.22	Common
	Klipspringer	2013-05-01	20	321538	1301.22	Common
	Klipspringer	2014-05-01	13	321538	1301.22	Common
	Klipspringer	2014-10-01	45	321538	1301.22	Common
	Klipspringer	2015-05-01	11	321538	1301.22	Common
	Kongoni	1996-03-01	2373	283000	1145.26	Common
	Kongoni	1996-09-01	3897	312300	1263.83	Common
	Kongoni	1997-03-01	1575	321800	1302.28	Common
	Kongoni	1997-10-01	5449	461100	1866.01	Common
	Kongoni	1998-03-01	2153	352300	1425.71	Common
	Kongoni	1998-10-01	1925	354100	1432.99	Common
	Kongoni	1999-04-01	2601	344940	1395.92	Common
	Kongoni	1999-10-01	785	346600	1402.64	Common
	Kongoni	2000-04-01	3094	372640	1508.02	Common
	Kongoni	2000-09-01	1312	325500	1317.25	Common
	Kongoni	2001-01-01	2410	359100	1453.23	Common
	Kongoni	2002-03-02	1212	326940	1323.08	Common
	Kongoni	2002-09-02	954	365740	1480.1	Common
	Kongoni	2003-04-01	897	222150	899.01	Common
	Kongoni	2003-10-01	981	271150	1097.31	Common
	Kongoni	2004-03-01	1015	298890	1209.57	Common
	Kongoni	2004-09-01	1394	315390	1276.34	Common
	Kongoni	2005-04-01	1268	319890	1294.55	Common
	Kongoni	2005-10-01	1753	320390	1296.57	Common
	Kongoni	2006-04-01	1346	325078	1315.55	Common
	Kongoni	2006-09-01	1429	326578	1321.62	Common
	Kongoni	2007-05-01	1191	326578	1321.62	Common
	Kongoni	2007-10-01	1118	326578	1321.62	Common
	Kongoni	2008-04-01	1221	326578	1321.62	Common
	Kongoni	2008-10-01	1245	326578	1321.62	Common
	Kongoni	2009-05-01	660	326538	1321.45	Common
	Kongoni	2009-09-01	556	326578	1321.62	Common
	Kongoni	2010-04-01	809	326578	1321.62	Common
	Kongoni	2010-10-01	939	326578	1321.62	Common
	Kongoni	2011-05-01	1303	326578	1321.62	Common
	Kongoni	2011-11-01	2440	221350	895.772	Common
	Kongoni	2012-05-01	1149	321538	1301.22	Common
	Kongoni	2012-10-01	885	321538	1301.22	Common
	Kongoni	2013-05-01	1761	321538	1301.22	Common
	Kongoni	2014-05-01	1436	321538	1301.22	Common
	Kongoni	2014-10-01	2081	321538	1301.22	Common
	Kongoni	2015-05-01	924	321538	1301.22	Common
	Kori bustard	2002-03-02	9	326940	1323.08	Rare
	Kori bustard	2002-09-02	13	365740	1480.1	Rare
	Kori bustard	2011-05-01	27	326578	1321.62	Rare
	Kori bustard	2012-05-01	11	321538	1301.22	Rare
	Kori Bustard	2012-10-01	36	321538	1301.22	Rare
	Kori Bustard	2013-05-01	62	321538	1301.22	Rare
	Kori Bustard	2014-05-01	40	321538	1301.22	Rare
	Kori Bustard	2014-10-01	55	321538	1301.22	Rare
	Kori Bustard	2015-05-01	31	321538	1301.22	Rare
	Leopard	1996-03-01	11	283000	1145.26	Common
	Leopard	1996-09-01	19	312300	1263.83	Common
	Leopard	1997-03-01	15	321800	1302.28	Common
	Leopard	1997-10-01	25	461100	1866.01	Common
	Leopard	1998-03-01	16	352300	1425.71	Common
	Leopard	1998-10-01	16	354100	1432.99	Common
	Leopard	1999-04-01	15	344940	1395.92	Common
	Leopard	1999-10-01	12	346600	1402.64	Common
	Leopard	2000-04-01	22	372640	1508.02	Common
	Leopard	2000-09-01	19	325500	1317.25	Common
	Leopard	2001-01-01	15	359100	1453.23	Common
	Leopard	2002-03-02	15	326940	1323.08	Common
	Leopard	2002-09-02	24	365740	1480.1	Common
	Leopard	2003-04-01	5	222150	899.01	Common
	Leopard	2003-10-01	5	271150	1097.31	Common
	Leopard	2004-03-01	6	298890	1209.57	Common
	Leopard	2004-09-01	3	315390	1276.34	Common
	Leopard	2005-04-01	16	319890	1294.55	Common
	Leopard	2005-10-01	18	320390	1296.57	Common
	Leopard	2006-04-01	12	325078	1315.55	Common
	Leopard	2006-09-01	10	326578	1321.62	Common
	Leopard	2007-05-01	17	326578	1321.62	Common
	Leopard	2007-10-01	13	326578	1321.62	Common
	Leopard	2008-04-01	13	326578	1321.62	Common
	Leopard	2008-10-01	11	326578	1321.62	Common
	Leopard	2009-05-01	12	326538	1321.45	Common
	Leopard	2009-09-01	9	326578	1321.62	Common
	Leopard	2010-04-01	10	326578	1321.62	Common
	Leopard	2010-10-01	8	326578	1321.62	Common
	Leopard	2011-05-01	9	326578	1321.62	Common
	Leopard	2012-05-01	7	321538	1301.22	Common
	Leopard	2012-10-01	2	321538	1301.22	Common
	Leopard	2013-05-01	7	321538	1301.22	Common
	Leopard	2014-05-01	5	321538	1301.22	Common
	Leopard	2014-10-01	9	321538	1301.22	Common
	Leopard	2015-05-01	11	321538	1301.22	Common
	Lion	1996-03-01	0	283000	1145.26	Common
	Lion	1996-09-01	0	312300	1263.83	Common
	Lion	1997-03-01	0	321800	1302.28	Common
	Lion	1997-10-01	1	461100	1866.01	Common
	Lion	1998-03-01	0	352300	1425.71	Common
	Lion	1998-10-01	0	354100	1432.99	Common
	Lion	1999-04-01	0	344940	1395.92	Common
	Lion	1999-10-01	0	346600	1402.64	Common
	Lion	2000-04-01	0	372640	1508.02	Common
	Lion	2000-09-01	0	325500	1317.25	Common
	Lion	2001-01-01	0	359100	1453.23	Common
	Lion	2002-03-02	2	326940	1323.08	Common
	Lion	2002-09-02	2	365740	1480.1	Common
	Lion	2003-04-01	10	222150	899.01	Common
	Lion	2009-09-01	1	326578	1321.62	Common
	Lion	2011-05-01	1	326578	1321.62	Common
	Lion	2012-05-01	1	321538	1301.22	Common
	Lion	2012-10-01	0	321538	1301.22	Common
	Lion	2013-05-01	1	321538	1301.22	Common
	Lion	2014-05-01	1	321538	1301.22	Common
	Lion	2014-10-01	3	321538	1301.22	Common
	Lion	2015-05-01	12	321538	1301.22	Common
	Mongoose	2002-09-02	89	365740	1480.1	Common
	Mongoose	2003-04-01	14	222150	899.01	Common
	Mongoose	2003-10-01	16	271150	1097.31	Common
	Mongoose	2004-03-01	45	298890	1209.57	Common
	Mongoose	2004-09-01	26	315390	1276.34	Common
	Mongoose	2005-04-01	10	319890	1294.55	Common
	Mongoose	2005-10-01	301	320390	1296.57	Common
	Mongoose	2006-04-01	30	325078	1315.55	Common
	Mongoose	2006-09-01	1	326578	1321.62	Common
	Mongoose	2007-05-01	37	326578	1321.62	Common
	Mongoose	2007-10-01	9	326578	1321.62	Common
	Mongoose	2008-04-01	34	326578	1321.62	Common
	Mongoose	2008-10-01	35	326578	1321.62	Common
	Mongoose	2009-05-01	28	326538	1321.45	Common
	Mongoose	2009-09-01	35	326578	1321.62	Common
	Mongoose	2010-04-01	18	326578	1321.62	Common
	Mongoose	2010-10-01	41	326578	1321.62	Common
	Mongoose	2011-05-01	6	326578	1321.62	Common
	Mongoose	2012-05-01	22	321538	1301.22	Common
	Mongoose	2012-10-01	8	321538	1301.22	Common
	Mongoose	2013-05-01	34	321538	1301.22	Common
	Mongoose	2014-05-01	23	321538	1301.22	Common
	Mongoose	2014-10-01	48	321538	1301.22	Common
	Mongoose	2015-05-01	12	321538	1301.22	Common
	Oribi	2005-10-01	33	320390	1296.57	Common
	Oribi	2006-04-01	40	325078	1315.55	Common
	Oribi	2006-09-01	52	326578	1321.62	Common
	Oribi	2007-05-01	66	326578	1321.62	Common
	Oribi	2007-10-01	71	326578	1321.62	Common
	Oribi	2008-04-01	90	326578	1321.62	Common
	Oribi	2008-10-01	89	326578	1321.62	Common
	Oribi	2009-05-01	82	326538	1321.45	Common
	Oribi	2009-09-01	81	326578	1321.62	Common
	Oribi	2010-04-01	41	326578	1321.62	Common
	Oribi	2010-10-01	24	326578	1321.62	Common
	Oribi	2011-05-01	40	326578	1321.62	Common
	Oribi	2011-11-01	23	221350	895.772	Common
	Oribi	2012-10-01	0	321538	1301.22	Common
	Oribi	2013-05-01	31	321538	1301.22	Common
	Oribi	2014-05-01	25	321538	1301.22	Common
	Oribi	2014-10-01	27	321538	1301.22	Common
	Oribi	2015-05-01	23	321538	1301.22	Common
	Oryx	2002-03-02	29	326940	1323.08	Common
	Oryx	2002-09-02	0	365740	1480.1	Common
	Oryx	2003-04-01	31	222150	899.01	Common
	Oryx	2003-10-01	11	271150	1097.31	Common
	Oryx	2004-03-01	16	298890	1209.57	Common
	Oryx	2004-09-01	18	315390	1276.34	Common
	Oryx	2005-04-01	30	319890	1294.55	Common
	Oryx	2005-10-01	49	320390	1296.57	Common
	Oryx	2006-04-01	31	325078	1315.55	Common
	Oryx	2006-09-01	35	326578	1321.62	Common
	Oryx	2007-05-01	32	326578	1321.62	Common
	Oryx	2007-10-01	19	326578	1321.62	Common
	Oryx	2008-04-01	31	326578	1321.62	Common
	Oryx	2008-10-01	35	326578	1321.62	Common
	Oryx	2009-05-01	37	326538	1321.45	Common
	Oryx	2009-09-01	38	326578	1321.62	Common
	Oryx	2010-04-01	36	326578	1321.62	Common
	Oryx	2010-10-01	47	326578	1321.62	Common
	Oryx	2011-05-01	43	326578	1321.62	Common
	Oryx	2011-11-01	44	221350	895.772	Common
	Oryx	2012-05-01	56	321538	1301.22	Common
	Oryx	2012-10-01	2	321538	1301.22	Common
	Oryx	2013-05-01	51	321538	1301.22	Common
	Oryx	2014-05-01	46	321538	1301.22	Common
	Oryx	2014-10-01	42	321538	1301.22	Common
	Oryx	2015-05-01	27	321538	1301.22	Common
	Ostrich	1996-03-01	52	283000	1145.26	Common
	Ostrich	1996-09-01	108	312300	1263.83	Common
	Ostrich	1997-03-01	21	321800	1302.28	Common
	Ostrich	1997-10-01	456	461100	1866.01	Common
	Ostrich	1998-03-01	64	352300	1425.71	Common
	Ostrich	1998-10-01	85	354100	1432.99	Common
	Ostrich	1999-04-01	83	344940	1395.92	Common
	Ostrich	1999-10-01	14	346600	1402.64	Common
	Ostrich	2000-04-01	68	372640	1508.02	Common
	Ostrich	2000-09-01	34	325500	1317.25	Common
	Ostrich	2001-01-01	37	359100	1453.23	Common
	Ostrich	2002-03-02	32	326940	1323.08	Common
	Ostrich	2002-09-02	37	365740	1480.1	Common
	Ostrich	2003-04-01	52	222150	899.01	Common
	Ostrich	2003-10-01	27	271150	1097.31	Common
	Ostrich	2004-03-01	23	298890	1209.57	Common
	Ostrich	2004-09-01	53	315390	1276.34	Common
	Ostrich	2005-04-01	52	319890	1294.55	Common
	Ostrich	2005-10-01	58	320390	1296.57	Common
	Ostrich	2006-04-01	56	325078	1315.55	Common
	Ostrich	2006-09-01	62	326578	1321.62	Common
	Ostrich	2007-05-01	54	326578	1321.62	Common
	Ostrich	2007-10-01	55	326578	1321.62	Common
	Ostrich	2008-04-01	47	326578	1321.62	Common
	Ostrich	2008-10-01	46	326578	1321.62	Common
	Ostrich	2009-05-01	76	326538	1321.45	Common
	Ostrich	2009-09-01	59	326578	1321.62	Common
	Ostrich	2010-04-01	53	326578	1321.62	Common
	Ostrich	2010-10-01	40	326578	1321.62	Common
	Ostrich	2011-05-01	36	326578	1321.62	Common
	Ostrich	2012-05-01	69	321538	1301.22	Common
	Ostrich	2012-10-01	83	321538	1301.22	Common
	Ostrich	2013-05-01	86	321538	1301.22	Common
	Ostrich	2014-10-01	69	321538	1301.22	Common
	Ostrich	2015-05-01	24	321538	1301.22	Common
	Porcupine	2002-09-02	17	365740	1480.1	Common
	Porcupine	2005-04-01	122	319890	1294.55	Common
	Porcupine	2005-10-01	8	320390	1296.57	Common
	Porcupine	2006-04-01	8	325078	1315.55	Common
	Porcupine	2007-05-01	2	326578	1321.62	Common
	Porcupine	2008-04-01	6	326578	1321.62	Common
	Porcupine	2008-10-01	3	326578	1321.62	Common
	Porcupine	2009-05-01	10	326538	1321.45	Common
	Porcupine	2009-09-01	3	326578	1321.62	Common
	Porcupine	2010-04-01	2	326578	1321.62	Common
	Porcupine	2010-10-01	7	326578	1321.62	Common
	Porcupine	2012-10-01	14	321538	1301.22	Common
	Porcupine	2013-05-01	15	321538	1301.22	Common
	Porcupine	2014-05-01	15	321538	1301.22	Common
	Porcupine	2014-10-01	5	321538	1301.22	Common
	Porcupine	2015-05-01	9	321538	1301.22	Common
	Python	2010-10-01	5	326578	1321.62	Rare
	Python	2011-05-01	2	326578	1321.62	Rare
	Python	2012-05-01	1	321538	1301.22	Rare
	Python	2012-10-01	8	321538	1301.22	Rare
	Python	2013-05-01	67	321538	1301.22	Rare
	Python	2014-05-01	7	321538	1301.22	Rare
	Python	2014-10-01	9	321538	1301.22	Rare
	Python	2015-05-01	4	321538	1301.22	Rare
	Reedbuck	1996-03-01	80	283000	1145.26	Common
	Reedbuck	1996-09-01	183	312300	1263.83	Common
	Reedbuck	1997-03-01	106	321800	1302.28	Common
	Reedbuck	1997-10-01	140	461100	1866.01	Common
	Reedbuck	1998-03-01	97	352300	1425.71	Common
	Reedbuck	1998-10-01	86	354100	1432.99	Common
	Reedbuck	1999-04-01	136	344940	1395.92	Common
	Reedbuck	1999-10-01	45	346600	1402.64	Common
	Reedbuck	2000-04-01	102	372640	1508.02	Common
	Reedbuck	2000-09-01	153	325500	1317.25	Common
	Reedbuck	2001-01-01	85	359100	1453.23	Common
	Reedbuck	2002-03-02	78	326940	1323.08	Common
	Reedbuck	2002-09-02	52	365740	1480.1	Common
	Reedbuck	2003-04-01	30	222150	899.01	Common
	Reedbuck	2003-10-01	73	271150	1097.31	Common
	Reedbuck	2004-03-01	83	298890	1209.57	Common
	Reedbuck	2004-09-01	55	315390	1276.34	Common
	Reedbuck	2005-04-01	77	319890	1294.55	Common
	Reedbuck	2005-10-01	69	320390	1296.57	Common
	Reedbuck	2006-04-01	102	325078	1315.55	Common
	Reedbuck	2006-09-01	69	326578	1321.62	Common
	Reedbuck	2007-05-01	101	326578	1321.62	Common
	Reedbuck	2007-10-01	59	326578	1321.62	Common
	Reedbuck	2008-04-01	169	326578	1321.62	Common
	Reedbuck	2008-10-01	146	326578	1321.62	Common
	Reedbuck	2009-05-01	165	326538	1321.45	Common
	Reedbuck	2009-09-01	95	326578	1321.62	Common
	Reedbuck	2010-04-01	77	326578	1321.62	Common
	Reedbuck	2010-10-01	131	326578	1321.62	Common
	Reedbuck	2011-05-01	84	326578	1321.62	Common
	Reedbuck	2011-11-01	16	221350	895.772	Common
	Reedbuck	2012-05-01	69	321538	1301.22	Common
	Reedbuck	2012-10-01	20	321538	1301.22	Common
	Reedbuck	2013-05-01	241	321538	1301.22	Common
	Reedbuck	2014-05-01	146	321538	1301.22	Common
	Reedbuck	2014-10-01	160	321538	1301.22	Common
	Reedbuck	2015-05-01	263	321538	1301.22	Common
	Rock hyrax	2012-10-01	224	321538	1301.22	Common
	Rock hyrax	2013-05-01	569	321538	1301.22	Common
	Rock hyrax	2014-05-01	146	321538	1301.22	Common
	Rock hyrax	2014-10-01	620	321538	1301.22	Common
	Rock hyrax	2015-05-01	443	321538	1301.22	Common
	Secretary bird	2011-05-01	12	326578	1321.62	Rare
	Secretary bird	2012-05-01	37	321538	1301.22	Rare
	Secretary bird	2012-10-01	11	321538	1301.22	Rare
	Secretary bird	2013-05-01	18	321538	1301.22	Rare
	Secretary bird	2014-05-01	17	321538	1301.22	Rare
	Secretary bird	2014-10-01	15	321538	1301.22	Rare
	Secretary bird	2015-05-01	27	321538	1301.22	Rare
	Serval cat	1996-03-01	4	283000	1145.26	Common
	Serval cat	1996-09-01	21	312300	1263.83	Common
	Serval cat	1997-03-01	17	321800	1302.28	Common
	Serval cat	1997-10-01	27	461100	1866.01	Common
	Serval cat	1998-03-01	12	352300	1425.71	Common
	Serval cat	1998-10-01	1	354100	1432.99	Common
	Serval cat	1999-04-01	10	344940	1395.92	Common
	Serval cat	1999-10-01	29	346600	1402.64	Common
	Serval cat	2000-04-01	12	372640	1508.02	Common
	Serval cat	2000-09-01	13	325500	1317.25	Common
	Serval cat	2001-01-01	9	359100	1453.23	Common
	Serval cat	2002-03-02	48	326940	1323.08	Common
	Serval cat	2002-09-02	11	365740	1480.1	Common
	Serval cat	2003-10-01	3	271150	1097.31	Common
	Serval cat	2004-03-01	2	298890	1209.57	Common
	Serval cat	2004-09-01	3	315390	1276.34	Common
	Serval cat	2005-04-01	5	319890	1294.55	Common
	Serval cat	2005-10-01	6	320390	1296.57	Common
	Serval cat	2006-04-01	6	325078	1315.55	Common
	Serval cat	2006-09-01	5	326578	1321.62	Common
	Serval cat	2007-05-01	4	326578	1321.62	Common
	Serval cat	2007-10-01	23	326578	1321.62	Common
	Serval cat	2008-04-01	19	326578	1321.62	Common
	Serval cat	2008-10-01	15	326578	1321.62	Common
	Serval cat	2009-05-01	12	326538	1321.45	Common
	Serval cat	2009-09-01	8	326578	1321.62	Common
	Serval cat	2010-04-01	11	326578	1321.62	Common
	Serval cat	2010-10-01	8	326578	1321.62	Common
	Serval cat	2011-05-01	11	326578	1321.62	Common
	Serval cat	2012-05-01	12	321538	1301.22	Common
	Serval cat	2012-10-01	26	321538	1301.22	Common
	Serval cat	2013-05-01	3	321538	1301.22	Common
	Serval Cat	2014-05-01	4	321538	1301.22	Common
	Serval cat	2014-10-01	43	321538	1301.22	Common
	Serval Cat	2015-05-01	8	321538	1301.22	Common
	Spring hare	2002-03-02	211	326940	1323.08	Common
	Spring hare	2002-09-02	83	365740	1480.1	Common
	Spring hare	2003-04-01	27	222150	899.01	Common
	Spring hare	2003-10-01	19	271150	1097.31	Common
	Spring hare	2004-03-01	22	298890	1209.57	Common
	Spring hare	2005-04-01	41	319890	1294.55	Common
	Spring hare	2005-10-01	213	320390	1296.57	Common
	Spring hare	2006-04-01	29	325078	1315.55	Common
	Spring hare	2006-09-01	25	326578	1321.62	Common
	Spring hare	2007-05-01	153	326578	1321.62	Common
	Spring hare	2007-10-01	18	326578	1321.62	Common
	Spring hare	2008-04-01	41	326578	1321.62	Common
	Spring hare	2008-10-01	188	326578	1321.62	Common
	Spring hare	2009-05-01	238	326538	1321.45	Common
	Spring hare	2009-09-01	183	326578	1321.62	Common
	Spring hare	2010-04-01	175	326578	1321.62	Common
	Spring hare	2010-10-01	169	326578	1321.62	Common
	Spring hare	2011-05-01	5	326578	1321.62	Common
	Spring hare	2012-05-01	22	321538	1301.22	Common
	Spring hare	2012-10-01	116	321538	1301.22	Common
	Spring hare	2013-05-01	133	321538	1301.22	Common
	Spring hare	2014-05-01	12	321538	1301.22	Common
	Spring hare	2014-10-01	128	321538	1301.22	Common
	Spring hare	2015-05-01	157	321538	1301.22	Common
	Steenbuck	2012-10-01	0	321538	1301.22	Common
	Steenbuck	2013-05-01	27	321538	1301.22	Common
	Steenbuck	2014-05-01	22	321538	1301.22	Common
	Steenbuck	2014-10-01	12	321538	1301.22	Common
	Steenbuck	2015-05-01	14	321538	1301.22	Common
	Steinbuck	1996-03-01	38	283000	1145.26	Common
	Steinbuck	1996-09-01	123	312300	1263.83	Common
	Steinbuck	1997-03-01	112	321800	1302.28	Common
	Steinbuck	1997-10-01	389	461100	1866.01	Common
	Steinbuck	1998-03-01	107	352300	1425.71	Common
	Steinbuck	1998-10-01	73	354100	1432.99	Common
	Steinbuck	1999-04-01	101	344940	1395.92	Common
	Steinbuck	1999-10-01	46	346600	1402.64	Common
	Steinbuck	2000-04-01	79	372640	1508.02	Common
	Steinbuck	2000-09-01	81	325500	1317.25	Common
	Steinbuck	2001-01-01	62	359100	1453.23	Common
	Steinbuck	2002-03-02	73	326940	1323.08	Common
	Steinbuck	2002-09-02	36	365740	1480.1	Common
	Steinbuck	2003-04-01	39	222150	899.01	Common
	Steinbuck	2003-10-01	58	271150	1097.31	Common
	Steinbuck	2004-03-01	57	298890	1209.57	Common
	Steinbuck	2004-09-01	45	315390	1276.34	Common
	Steinbuck	2005-04-01	81	319890	1294.55	Common
	Steinbuck	2005-10-01	51	320390	1296.57	Common
	Steinbuck	2006-04-01	76	325078	1315.55	Common
	Steinbuck	2006-09-01	95	326578	1321.62	Common
	Steinbuck	2007-05-01	72	326578	1321.62	Common
	Steinbuck	2007-10-01	84	326578	1321.62	Common
	Steinbuck	2008-04-01	95	326578	1321.62	Common
	Steinbuck	2008-10-01	57	326578	1321.62	Common
	Steinbuck	2009-05-01	118	326538	1321.45	Common
	Steinbuck	2009-09-01	58	326578	1321.62	Common
	Steinbuck	2010-04-01	18	326578	1321.62	Common
	Steinbuck	2010-10-01	53	326578	1321.62	Common
	Steinbuck	2011-05-01	42	326578	1321.62	Common
	Steinbuck	2011-11-01	4	221350	895.772	Common
	Steinbuck	2012-05-01	12	321538	1301.22	Common
	Sykes monkey	1996-03-01	64	283000	1145.26	Common
	Sykes monkey	1996-09-01	125	312300	1263.83	Common
	Sykes monkey	1997-03-01	70	321800	1302.28	Common
	Sykes monkey	1997-10-01	133	461100	1866.01	Common
	Sykes monkey	1998-03-01	121	352300	1425.71	Common
	Sykes monkey	1998-10-01	125	354100	1432.99	Common
	Sykes monkey	1999-04-01	27	344940	1395.92	Common
	Sykes monkey	1999-10-01	73	346600	1402.64	Common
	Sykes monkey	2000-04-01	153	372640	1508.02	Common
	Sykes monkey	2000-09-01	242	325500	1317.25	Common
	Sykes monkey	2001-01-01	14	359100	1453.23	Common
	Sykes monkey	2002-03-02	152	326940	1323.08	Common
	Sykes monkey	2002-09-02	155	365740	1480.1	Common
	Sykes monkey	2003-04-01	31	222150	899.01	Common
	Sykes monkey	2003-10-01	71	271150	1097.31	Common
	Sykes monkey	2004-03-01	144	298890	1209.57	Common
	Sykes monkey	2004-09-01	247	315390	1276.34	Common
	Sykes monkey	2005-04-01	33	319890	1294.55	Common
	Sykes monkey	2005-10-01	226	320390	1296.57	Common
	Sykes monkey	2006-04-01	73	325078	1315.55	Common
	Sykes monkey	2006-09-01	68	326578	1321.62	Common
	Sykes monkey	2007-05-01	63	326578	1321.62	Common
	Sykes monkey	2007-10-01	109	326578	1321.62	Common
	Sykes monkey	2008-04-01	77	326578	1321.62	Common
	Sykes monkey	2008-10-01	64	326578	1321.62	Common
	Sykes monkey	2009-05-01	208	326538	1321.45	Common
	Sykes monkey	2009-09-01	161	326578	1321.62	Common
	Sykes monkey	2010-04-01	140	326578	1321.62	Common
	Sykes monkey	2010-10-01	110	326578	1321.62	Common
	Sykes monkey	2011-05-01	223	326578	1321.62	Common
	Sykes monkey	2012-05-01	37	321538	1301.22	Common
	Sykes monkey	2012-10-01	60	321538	1301.22	Common
	Sykes monkey	2013-05-01	105	321538	1301.22	Common
	Sykes monkey	2014-05-01	230	321538	1301.22	Common
	Sykes monkey	2014-10-01	65	321538	1301.22	Common
	Sykes monkey	2015-05-01	25	321538	1301.22	Common
	Thomson's gazelle	1996-03-01	7668	283000	1145.26	Common
	Thomson's gazelle	1996-09-01	14746	312300	1263.83	Common
	Thomson's gazelle	1997-03-01	10005	321800	1302.28	Common
	Thomson's gazelle	1997-10-01	17200	461100	1866.01	Common
	Thomson's gazelle	1998-03-01	10999	352300	1425.71	Common
	Thomson's gazelle	1998-10-01	11502	354100	1432.99	Common
	Thomson's gazelle	1999-04-01	11480	344940	1395.92	Common
	Thomson's gazelle	1999-10-01	11423	346600	1402.64	Common
	Thomson's gazelle	2000-04-01	11907	372640	1508.02	Common
	Thomson's gazelle	2000-09-01	11125	325500	1317.25	Common
	Thomson's gazelle	2001-01-01	14322	359100	1453.23	Common
	Thomson's gazelle	2002-03-02	14215	326940	1323.08	Common
	Thomson's gazelle	2002-09-02	9966	365740	1480.1	Common
	Thomson's gazelle	2003-04-01	9151	222150	899.01	Common
	Thomson's gazelle	2003-10-01	12990	271150	1097.31	Common
	Thomson's gazelle	2004-03-01	14126	298890	1209.57	Common
	Thomson's gazelle	2004-09-01	16552	315390	1276.34	Common
	Thomson's gazelle	2005-04-01	15585	319890	1294.55	Common
	Thomson's gazelle	2005-10-01	17877	320390	1296.57	Common
	Thomson's gazelle	2006-04-01	13075	325078	1315.55	Common
	Thomson's gazelle	2006-09-01	12605	326578	1321.62	Common
	Thomson's gazelle	2007-05-01	15076	326578	1321.62	Common
	Thomson's gazelle	2007-10-01	14590	326578	1321.62	Common
	Thomson's gazelle	2008-04-01	15732	326578	1321.62	Common
	Thomson's gazelle	2008-10-01	15169	326578	1321.62	Common
	Thomson's gazelle	2009-05-01	14861	326538	1321.45	Common
	Thomson's gazelle	2009-09-01	13205	326578	1321.62	Common
	Thomson's gazelle	2010-04-01	11862	326578	1321.62	Common
	Thomson's gazelle	2010-10-01	14589	326578	1321.62	Common
	Thomson's gazelle	2011-05-01	18402	326578	1321.62	Common
	Thomson's gazelle	2011-11-01	10243	221350	895.772	Common
	Thomson's gazelle	2012-05-01	9953	321538	1301.22	Common
	Thomson's gazelle	2012-10-01	5798	321538	1301.22	Common
	Thomson's gazelle	2013-05-01	12345	321538	1301.22	Common
	Thomson's gazelle	2014-05-01	11100	321538	1301.22	Common
	Thomson's gazelle	2014-10-01	12194	321538	1301.22	Common
	Thomson's gazelle	2015-05-01	8506	321538	1301.22	Common
	Topi	2002-03-02	35	326940	1323.08	Common
	Topi	2002-09-02	28	365740	1480.1	Common
	Topi	2003-04-01	60	222150	899.01	Common
	Topi	2003-10-01	46	271150	1097.31	Common
	Topi	2004-03-01	69	298890	1209.57	Common
	Topi	2004-09-01	56	315390	1276.34	Common
	Topi	2005-04-01	156	319890	1294.55	Common
	Topi	2005-10-01	160	320390	1296.57	Common
	Topi	2006-04-01	83	325078	1315.55	Common
	Topi	2006-09-01	53	326578	1321.62	Common
	Topi	2007-05-01	74	326578	1321.62	Common
	Topi	2007-10-01	57	326578	1321.62	Common
	Topi	2008-04-01	83	326578	1321.62	Common
	Topi	2008-10-01	62	326578	1321.62	Common
	Topi	2009-05-01	91	326538	1321.45	Common
	Topi	2009-09-01	63	326578	1321.62	Common
	Topi	2010-04-01	40	326578	1321.62	Common
	Topi	2010-10-01	72	326578	1321.62	Common
	Topi	2011-05-01	65	326578	1321.62	Common
	Topi	2011-11-01	86	221350	895.772	Common
	Topi	2012-05-01	93	321538	1301.22	Common
	Topi	2012-10-01	27	321538	1301.22	Common
	Topi	2013-05-01	129	321538	1301.22	Common
	Topi	2014-05-01	147	321538	1301.22	Common
	Topi	2014-10-01	126	321538	1301.22	Common
	Topi	2015-05-01	80	321538	1301.22	Common
	Tortoise	2011-05-01	8	326578	1321.62	Rare
	Tortoise	2012-10-01	2	321538	1301.22	Rare
	Tortoise	2013-05-01	10	321538	1301.22	Rare
	Tortoise	2014-05-01	41	321538	1301.22	Rare
	Tortoise	2014-10-01	426	321538	1301.22	Rare
	Tortoise	2015-05-01	27	321538	1301.22	Rare
	Vervet monkey	1996-03-01	14	283000	1145.26	Common
	Vervet monkey	1996-09-01	353	312300	1263.83	Common
	Vervet monkey	1997-03-01	375	321800	1302.28	Common
	Vervet monkey	1997-10-01	361	461100	1866.01	Common
	Vervet monkey	1998-03-01	139	352300	1425.71	Common
	Vervet monkey	1998-10-01	700	354100	1432.99	Common
	Vervet monkey	1999-04-01	346	344940	1395.92	Common
	Vervet monkey	1999-10-01	187	346600	1402.64	Common
	Vervet monkey	2000-04-01	464	372640	1508.02	Common
	Vervet monkey	2000-09-01	436	325500	1317.25	Common
	Vervet monkey	2001-01-01	232	359100	1453.23	Common
	Vervet monkey	2002-03-02	235	326940	1323.08	Common
	Vervet monkey	2002-09-02	294	365740	1480.1	Common
	Vervet monkey	2003-04-01	260	222150	899.01	Common
	Vervet monkey	2003-10-01	261	271150	1097.31	Common
	Vervet monkey	2004-03-01	415	298890	1209.57	Common
	Vervet monkey	2004-09-01	309	315390	1276.34	Common
	Vervet monkey	2005-04-01	489	319890	1294.55	Common
	Vervet monkey	2005-10-01	338	320390	1296.57	Common
	Vervet monkey	2006-04-01	465	325078	1315.55	Common
	Vervet monkey	2006-09-01	395	326578	1321.62	Common
	Vervet monkey	2007-05-01	477	326578	1321.62	Common
	Vervet monkey	2007-10-01	310	326578	1321.62	Common
	Vervet monkey	2008-04-01	539	326578	1321.62	Common
	Vervet monkey	2008-10-01	483	326578	1321.62	Common
	Vervet monkey	2009-05-01	1049	326538	1321.45	Common
	Vervet monkey	2009-09-01	665	326578	1321.62	Common
	Vervet monkey	2010-04-01	584	326578	1321.62	Common
	Vervet monkey	2010-10-01	446	326578	1321.62	Common
	Vervet monkey	2011-05-01	777	326578	1321.62	Common
	Vervet monkey	2012-05-01	273	321538	1301.22	Common
	Vervet monkey	2012-10-01	630	321538	1301.22	Common
	Vervet monkey	2013-05-01	327	321538	1301.22	Common
	Vervet monkey	2014-05-01	783	321538	1301.22	Common
	Vervet monkey	2014-10-01	12036	321538	1301.22	Common
	Vervet monkey	2015-05-01	663	321538	1301.22	Common
	Warthog	1996-03-01	219	283000	1145.26	Common
	Warthog	1996-09-01	441	312300	1263.83	Common
	Warthog	1997-03-01	511	321800	1302.28	Common
	Warthog	1997-10-01	1184	461100	1866.01	Common
	Warthog	1998-03-01	504	352300	1425.71	Common
	Warthog	1998-10-01	800	354100	1432.99	Common
	Warthog	1999-04-01	847	344940	1395.92	Common
	Warthog	1999-10-01	615	346600	1402.64	Common
	Warthog	2000-04-01	1040	372640	1508.02	Common
	Warthog	2000-09-01	1070	325500	1317.25	Common
	Warthog	2001-01-01	901	359100	1453.23	Common
	Warthog	2002-03-02	1329	326940	1323.08	Common
	Warthog	2002-09-02	1630	365740	1480.1	Common
	Warthog	2003-04-01	1522	222150	899.01	Common
	Warthog	2003-10-01	2149	271150	1097.31	Common
	Warthog	2004-03-01	2298	298890	1209.57	Common
	Warthog	2004-09-01	2466	315390	1276.34	Common
	Warthog	2005-04-01	2739	319890	1294.55	Common
	Warthog	2005-10-01	3782	320390	1296.57	Common
	Warthog	2006-04-01	2620	325078	1315.55	Common
	Warthog	2006-09-01	3062	326578	1321.62	Common
	Warthog	2007-05-01	3243	326578	1321.62	Common
	Warthog	2007-10-01	2793	326578	1321.62	Common
	Warthog	2008-04-01	4593	326578	1321.62	Common
	Warthog	2008-10-01	3523	326578	1321.62	Common
	Warthog	2009-05-01	4014	326538	1321.45	Common
	Warthog	2009-09-01	2851	326578	1321.62	Common
	Warthog	2010-04-01	2083	326578	1321.62	Common
	Warthog	2010-10-01	2574	326578	1321.62	Common
	Warthog	2011-05-01	2859	326578	1321.62	Common
	Warthog	2011-11-01	972	221350	895.772	Common
	Warthog	2012-05-01	3084	321538	1301.22	Common
	Warthog	2012-10-01	2523	321538	1301.22	Common
	Warthog	2013-05-01	3935	321538	1301.22	Common
	Warthog	2014-05-01	5206	321538	1301.22	Common
	Warthog	2014-10-01	4324	321538	1301.22	Common
	Warthog	2015-05-01	3963	321538	1301.22	Common
	Waterbuck	1996-03-01	314	283000	1145.26	Common
	Waterbuck	1996-09-01	1193	312300	1263.83	Common
	Waterbuck	1997-03-01	1133	321800	1302.28	Common
	Waterbuck	1997-10-01	1075	461100	1866.01	Common
	Waterbuck	1998-03-01	1142	352300	1425.71	Common
	Waterbuck	1998-10-01	1005	354100	1432.99	Common
	Waterbuck	1999-04-01	1224	344940	1395.92	Common
	Waterbuck	1999-10-01	978	346600	1402.64	Common
	Waterbuck	2000-04-01	1168	372640	1508.02	Common
	Waterbuck	2000-09-01	895	325500	1317.25	Common
	Waterbuck	2001-01-01	903	359100	1453.23	Common
	Waterbuck	2002-03-02	1022	326940	1323.08	Common
	Waterbuck	2002-09-02	1108	365740	1480.1	Common
	Waterbuck	2003-04-01	1083	222150	899.01	Common
	Waterbuck	2003-10-01	1071	271150	1097.31	Common
	Waterbuck	2004-03-01	1225	298890	1209.57	Common
	Waterbuck	2004-09-01	1059	315390	1276.34	Common
	Waterbuck	2005-04-01	938	319890	1294.55	Common
	Waterbuck	2005-10-01	1480	320390	1296.57	Common
	Waterbuck	2006-04-01	1405	325078	1315.55	Common
	Waterbuck	2006-09-01	1756	326578	1321.62	Common
	Waterbuck	2007-05-01	1395	326578	1321.62	Common
	Waterbuck	2007-10-01	1511	326578	1321.62	Common
	Waterbuck	2008-04-01	1402	326578	1321.62	Common
	Waterbuck	2008-10-01	1796	326578	1321.62	Common
	Waterbuck	2009-05-01	2225	326538	1321.45	Common
	Waterbuck	2009-09-01	1296	326578	1321.62	Common
	Waterbuck	2010-04-01	827	326578	1321.62	Common
	Waterbuck	2010-10-01	1035	326578	1321.62	Common
	Waterbuck	2011-05-01	1224	326578	1321.62	Common
	Waterbuck	2011-11-01	838	221350	895.772	Common
	Waterbuck	2012-05-01	1145	321538	1301.22	Common
	Waterbuck	2012-10-01	749	321538	1301.22	Common
	Waterbuck	2013-05-01	1509	321538	1301.22	Common
	Waterbuck	2014-05-01	1517	321538	1301.22	Common
	Waterbuck	2014-10-01	1319	321538	1301.22	Common
	Waterbuck	2015-05-01	1326	321538	1301.22	Common
	White rhino	2002-03-02	7	326940	1323.08	Common
	White rhino	2002-09-02	7	365740	1480.1	Common
	White rhino	2003-04-01	7	222150	899.01	Common
	White rhino	2003-10-01	7	271150	1097.31	Common
	White rhino	2004-03-01	7	298890	1209.57	Common
	White rhino	2004-09-01	9	315390	1276.34	Common
	White rhino	2005-04-01	27	319890	1294.55	Common
	White rhino	2005-10-01	22	320390	1296.57	Common
	White rhino	2006-04-01	12	325078	1315.55	Common
	White rhino	2006-09-01	12	326578	1321.62	Common
	White rhino	2007-05-01	15	326578	1321.62	Common
	White rhino	2007-10-01	14	326578	1321.62	Common
	White rhino	2008-04-01	15	326578	1321.62	Common
	White rhino	2008-10-01	13	326578	1321.62	Common
	White rhino	2009-05-01	15	326538	1321.45	Common
	White rhino	2009-09-01	13	326578	1321.62	Common
	White rhino	2010-04-01	4	326578	1321.62	Common
	White rhino	2010-10-01	12	326578	1321.62	Common
	White rhino	2011-05-01	12	326578	1321.62	Common
	White rhino	2011-11-01	15	221350	895.772	Common
	White rhino	2012-05-01	15	321538	1301.22	Common
	Wildebeest	1998-10-01	120	354100	1432.99	Common
	Wildebeest	1999-04-01	194	344940	1395.92	Common
	Wildebeest	1999-10-01	141	346600	1402.64	Common
	Wildebeest	2000-04-01	176	372640	1508.02	Common
	Wildebeest	2000-09-01	164	325500	1317.25	Common
	Wildebeest	2001-01-01	262	359100	1453.23	Common
	Wildebeest	2002-03-02	266	326940	1323.08	Common
	Wildebeest	2002-09-02	275	365740	1480.1	Common
	Wildebeest	2003-04-01	395	222150	899.01	Common
	Wildebeest	2003-10-01	341	271150	1097.31	Common
	Wildebeest	2004-03-01	416	298890	1209.57	Common
	Wildebeest	2004-09-01	565	315390	1276.34	Common
	Wildebeest	2005-04-01	600	319890	1294.55	Common
	Wildebeest	2005-10-01	767	320390	1296.57	Common
	Wildebeest	2006-04-01	662	325078	1315.55	Common
	Wildebeest	2006-09-01	1074	326578	1321.62	Common
	Wildebeest	2007-05-01	909	326578	1321.62	Common
	Wildebeest	2007-10-01	942	326578	1321.62	Common
	Wildebeest	2008-04-01	1090	326578	1321.62	Common
	Wildebeest	2008-10-01	1102	326578	1321.62	Common
	Wildebeest	2009-09-01	799	326578	1321.62	Common
	Wildebeest	2010-04-01	654	326578	1321.62	Common
	Wildebeest	2010-10-01	1073	326578	1321.62	Common
	Wildebeest	2011-05-01	1687	326578	1321.62	Common
	Wildebeest	2011-11-01	652	221350	895.772	Common
	Wildebeest	2012-05-01	1407	321538	1301.22	Common
	Wildebeest	2012-10-01	1336	321538	1301.22	Common
	Wildebeest	2013-05-01	1263	321538	1301.22	Common
	Wildebeest	2014-05-01	1670	321538	1301.22	Common
	Wildebeest	2014-10-01	1454	321538	1301.22	Common
	Wildebeest	2015-05-01	1594	321538	1301.22	Common
	Zebra	1996-03-01	5824	283000	1145.26	Common
	Zebra	1996-09-01	14786	312300	1263.83	Common
	Zebra	1997-03-01	10449	321800	1302.28	Common
	Zebra	1997-10-01	17194	461100	1866.01	Common
	Zebra	1998-03-01	11723	352300	1425.71	Common
	Zebra	1998-10-01	10249	354100	1432.99	Common
	Zebra	1999-04-01	11195	344940	1395.92	Common
	Zebra	1999-10-01	8234	346600	1402.64	Common
	Zebra	2000-04-01	8791	372640	1508.02	Common
	Zebra	2000-09-01	9572	325500	1317.25	Common
	Zebra	2001-01-01	14238	359100	1453.23	Common
	Zebra	2002-03-02	11582	326940	1323.08	Common
	Zebra	2002-09-02	9162	365740	1480.1	Common
	Zebra	2003-04-01	7269	222150	899.01	Common
	Zebra	2003-10-01	9419	271150	1097.31	Common
	Zebra	2004-03-01	8756	298890	1209.57	Common
	Zebra	2004-09-01	11028	315390	1276.34	Common
	Zebra	2005-04-01	8232	319890	1294.55	Common
	Zebra	2005-10-01	15304	320390	1296.57	Common
	Zebra	2006-04-01	11230	325078	1315.55	Common
	Zebra	2006-09-01	12564	326578	1321.62	Common
	Zebra	2007-05-01	13004	326578	1321.62	Common
	Zebra	2007-10-01	13085	326578	1321.62	Common
	Zebra	2008-04-01	13981	326578	1321.62	Common
	Zebra	2008-10-01	13842	326578	1321.62	Common
	Zebra	2009-05-01	10647	326538	1321.45	Common
	Zebra	2009-09-01	12071	326578	1321.62	Common
	Zebra	2010-04-01	11713	326578	1321.62	Common
	Zebra	2010-10-01	12003	326578	1321.62	Common
	Zebra	2011-05-01	12999	326578	1321.62	Common
	Zebra	2011-11-01	8608	221350	895.772	Common
	Zebra	2012-05-01	11225	321538	1301.22	Common
	Zebra	2012-10-01	8660	321538	1301.22	Common
	Zebra	2013-05-01	17037	321538	1301.22	Common
	Zebra	2014-05-01	14004	321538	1301.22	Common
	Zebra	2014-10-01	14358	321538	1301.22	Common
	Zebra	2015-05-01	12104	321538	1301.22	Common
	Zorilla	2002-09-02	139	365740	1480.1	Rare
	Zorilla	2003-10-01	3	271150	1097.31	Rare
	Zorilla	2012-10-01	0	321538	1301.22	Rare
	Zorilla	2013-05-01	0	321538	1301.22	Rare
	Zorilla	2013-05-01	0	321538	1301.22	Rare
	Zorilla	2014-05-01	0	321538	1301.22	Rare
	Zorilla	2014-10-01	212	321538	1301.22	Rare
