# Supplementary material for: Wildlife Population Dynamics in Human-Dominated Landscapes under Community-Based Conservation: The Example of Nakuru Wildlife Conservancy, Kenya
Source: PLoS One. 2017 Jan 19;12(1):e0169730. doi: 10.1371/journal.pone.0169730 (PMC5245813; doi:10.1371/journal.pone.0169730)
Supplement: S3 Table — For species that first increased and then declined, the expected density at the time of peak density and its differences from the estimates for 1996 and 2015 were similarly computed and tested for significance. (XLSX) [file pone.0169730.s009.xlsx]

## Sheet: S3Table
	Comparison	Species and dates compared	Estimate	Standard Error	DF	T- Value	Pr > |T|
	Number
	1	Aardvark at time=02/03/2002	-4.5407	0.5981	1073	-7.59	<0.0001
	2	Aardvark at time=01/05/2015	-4.1705	0.4056	1073	-10.28	<0.0001
	3	Diff for Aardvark at time= 02/03/2002 vs time= 01/05/2015	0.3702	0.7338	1073	0.5	0.614
	4	African hare at time=02/03/2002	-1.7648	0.3359	1073	-5.25	<0.0001
	5	African hare at time=01/05/2014	-1.0953	0.3931	1073	-2.79	0.0054
	6	Diff for African hare at time= 02/03/2002 vs time= 01/05/2014	0.6695	0.5274	1073	1.27	0.2045
	7	Baboon at time=01/03/1996	-0.601	0.3472	1073	-1.73	0.0837
	8	Baboon at time=01/05/2015	0.5284	0.3661	1073	1.44	0.1492
	9	Diff for Baboon at time= 01/03/1996 vs time= 01/05/2015	1.1295	0.4982	1073	2.27	0.0236
	10	Bat eared fox at time=01/10/1998	-3.7726	0.4023	1073	-9.38	<0.0001
	11	Bat eared fox at time=01/05/2014	-1.8238	0.3612	1073	-5.05	<0.0001
	12	Diff for Bat eared fox at time= 01/10/1998 vs time= 01/05/2014	1.9488	0.5382	1073	3.62	0.0003
	13	Buffalo at time=01/03/1996	0.0463	0.3319	1073	0.14	0.8891
	14	Buffalo at time=01/05/2015	1.0334	0.3491	1073	2.96	0.0031
	15	Diff for Buffalo at time=01/03/1996 vs time= 01/05/2015	0.9871	0.4762	1073	2.07	0.0384
	16	Bushbuck at time=01/03/1996	-1.9582	0.4226	1073	-4.63	<0.0001
	17	Bushbuck at time=01/05/2012	-4.7027	0.4436	1073	-10.6	<0.0001
	18	Diff for Bushbuck at time= 01/03/1996 vs time=01/05/2012	-2.7445	0.6076	1073	-4.52	<0.0001
	19	Bushpig at time=02/03/2002	-4.4298	0.4075	1073	-10.87	<0.0001
	20	Bushpig at time=01/05/2015	-3.7989	0.4287	1073	-8.86	<0.0001
	21	Diff for Bushpig at time= 02/03/2002 vs time= 01/05/2015	0.631	0.5965	1073	1.06	0.2904
	22	Cheetah at time=01/03/1996	0.5235	0.3319	1073	1.58	0.1151
	23	Cheetah at time=01/05/2015	0.6902	0.3469	1073	1.99	0.0469
	24	Diff for Cheetah at time= 01/03/1996 vs time= 01/05/2015	0.1667	0.4758	1073	0.35	0.7261
	25	Colobus monkey at time=01/03/1996	-2.0341	0.343	1073	-5.93	<0.0001
	26	Colobus monkey at time=01/05/2015	-2.162	0.3407	1073	-6.35	<0.0001
	27	Diff for Colobus monkey at time= 01/03/1996 vs time= 01/05/2015	-0.1278	0.4785	1073	-0.27	0.7894
	28	Dik dik at time=01/03/1996	-0.6045	0.3643	1073	-1.66	0.0974
	29	Dik dik at time=01/05/2015	-0.5047	0.3363	1073	-1.5	0.1337
	30	Diff for Dik dik at time= 01/03/1996 vs time= 01/05/2015	0.09975	0.4902	1073	0.2	0.8388
	31	Duiker at time=01/03/1996	-4.0423	0.4068	1073	-9.94	<0.0001
	32	Duiker at time=01/05/2015	-4.5514	0.3951	1073	-11.52	<0.0001
	33	Diff for Duiker at time= 01/03/1996 vs time= 01/05/2015	-0.5091	0.5601	1073	-0.91	0.3637
	34	Duiker at time=01/04/2006	-3.1391	0.1582	1073	-19.85	<0.0001
	35	Diff for Duiker at time= 01/03/1996 vs time= 01/04/2006	0.9032	0.4552	1073	1.98	0.0475
	36	Diff for Duiker at time= 01/04/2006 vs time= 01/05/2015	-1.4122	0.4314	1073	-3.27	0.0011
	37	Eland at time=01/03/1996	-5.4097	0.483	1073	-11.2	<0.0001
	38	Eland at time=01/05/2015	-9.8609	3.328	1073	-2.96	0.0031
	39	Diff for Eland at time= 01/03/1996 vs time= 01/05/2015	-4.4512	3.3566	1073	-1.33	0.1851
	40	Giraffe at time=01/03/1996	-1.5252	0.3371	1073	-4.52	<0.0001
	41	Giraffe at time=01/05/2015	-0.4399	0.3216	1073	-1.37	0.1717
	42	Diff for Giraffe at time= 01/03/1996 vs time= 01/05/2015	1.0854	0.4613	1073	2.35	0.0188
	43	Grant's gazelle at time=01/03/1996	0.3403	0.1547	1073	2.2	0.0281
	44	Grant's gazelle at time=01/05/2015	0.4519	0.3382	1073	1.34	0.1819
	45	Diff for Grant's gazelle at time= 01/03/1996 vs time= 01/05/2015	0.04474	0.4761	1073	0.09	0.9252
	46	Greater kudu at time=02/03/2002	-5.8156	0.5495	1073	-10.58	<0.0001
	47	Greater kudu at time=01/05/2015	-9.9077	2.0615	1073	-4.81	<0.0001
	48	Diff for Greater kudu at time= 02/03/2002 vs time= 01/05/2015	-4.0921	2.1587	1073	-1.9	0.0583
	49	Grevy's zebra at time=01/10/2003	-4.5971	0.4601	1073	-9.99	<0.0001
	50	Grevy's zebra at time=01/05/2015	-4.709	0.4501	1073	-10.46	<0.0001
	51	Diff for Grevy's zebra at time= 01/10/2003 vs time= 01/05/2015	-0.1118	0.6518	1073	-0.17	0.8638
	52	Guinea fowl at time=01/03/1996	-2.1709	0.3352	1073	-6.48	<0.0001
	53	Guinea fowl at time=01/05/2015	-0.2366	0.3336	1073	-0.71	0.4784
	54	Diff for Guinea fowl at time= 01/03/1996 vs time= 01/05/2015	1.9343	0.4675	1073	4.14	<0.0001
	55	Guinea fowl at time=01/10/2008	-1.1844	0.1512	1073	-7.84	<0.0001
	56	Diff for Guinea fowl at time= 01/03/1996 vs time= 01/10/2008	0.9864	0.3642	1073	2.71	0.0069
	57	Diff for Guinea fowl at time= 01/10/2008 vs time= 01/05/2015	0.9478	0.3414	1073	2.78	0.0056
	58	Hippopotamus at time=01/03/1996	-1.9462	0.382	1073	-5.09	<0.0001
	59	Hippopotamus at time=01/05/2015	-1.2683	0.3615	1073	-3.51	0.0005
	60	Diff for Hippopotamus at time= 01/03/1996 vs time= 01/05/2015	0.6779	0.5184	1073	1.31	0.1913
	61	Hippopotamus at time=01/10/2008	0.1657	0.1506	1073	1.1	0.2717
	62	Diff for Hippopotamus at time= 01/03/1996 vs time= 01/10/2008	2.1118	0.4116	1073	5.13	<0.0001
	63	Diff for Hippopotamus at time= 01/10/2008 vs time= 01/05/2015	-1.434	0.3564	1073	-4.02	<0.0001
	64	Hyena at time=01/03/1996	-2.7361	0.3825	1073	-7.15	<0.0001
	65	Hyena at time=01/05/2015	-2.0871	0.3906	1073	-5.34	<0.0001
	66	Diff for Hyena at time= 01/03/1996 vs time= 01/05/2015	0.649	0.5392	1073	1.2	0.229
	67	Impala at time=01/03/1996	1.4743	0.3495	1073	4.22	<0.0001
	68	Impala at time=01/05/2015	2.3763	0.3445	1073	6.9	<0.0001
	69	Diff for Impala at time= 01/03/1996 vs time= 01/05/2015	0.9019	0.4849	1073	1.86	0.0631
	70	Jackal at time=01/03/1996	-2.4536	0.373	1073	-6.58	<0.0001
	71	Jackal at time=01/05/2012	-2.2496	0.4136	1073	-5.44	<0.0001
	72	Diff for Jackal at time= 01/03/1996 vs time= 01/05/2012	0.204	0.5559	1073	0.37	0.7138
	73	Jackal at time=01/09/2006	-1.7732	0.15	1073	-11.82	<0.0001
	74	Diff for Jackal at time= 01/03/1996 vs time= 01/09/2006	0.6804	0.4177	1073	1.63	0.1037
	75	Diff for Jackal at time= 01/09/2006 vs time= 01/05/2012	-0.4764	0.4383	1073	-1.09	0.2773
	76	Klipspringer at time=01/03/1996	-4.4239	0.4088	1073	-10.82	<0.0001
	77	Klipspringer at time=01/05/2015	-3.7854	0.42	1073	-9.01	<0.0001
	78	Diff for Klipspringer at time= 01/03/1996 vs time= 01/05/2015	0.6385	0.5773	1073	1.11	0.269
	79	Hartebeest at time=01/03/1996	0.8347	0.3332	1073	2.5	0.0124
	80	Hartebeest at time=01/05/2015	-0.1282	0.3385	1073	-0.38	0.705
	81	Diff for Hartebeest at time= 01/03/1996 vs time= 01/05/2015	-0.9628	0.4694	1073	-2.05	0.0405
	82	Leopard at time=01/03/1996	-4.4705	0.4065	1073	-11	<0.0001
	83	Leopard at time=01/05/2015	-4.6912	0.4274	1073	-10.98	<0.0001
	84	Diff for Leopard at time= 01/03/1996 vs time= 01/05/2015	-0.2208	0.5846	1073	-0.38	0.7058
	85	Lion at time=01/03/1996	-10.3788	3.7027	1073	-2.8	0.0052
	86	Lion at time=01/05/2015	-4.8563	0.4516	1073	-10.75	<.0001
	87	Diff for Lion at time= 01/03/1996 vs time= 01/05/2015	5.5225	3.7218	1073	1.48	0.1381
	88	Mongoose at time=02/09/2002	-3.1427	0.3401	1073	-9.24	<0.0001
	89	Mongoose at time=01/05/2015	-3.8434	0.4251	1073	-9.04	<0.0001
	90	Diff for Mongoose at time= 02/09/2002 vs time= 01/05/2015	-0.7007	0.5511	1073	-1.27	0.2038
	91	Oribi at time=01/10/2005	-3.8449	0.353	1073	-10.89	<0.0001
	92	Oribi at time=01/05/2015	-3.899	0.3915	1073	-9.96	<0.0001
	93	Diff for Oribi at time= 01/10/2005 vs time= 01/05/2015	-0.0541	0.5084	1073	-0.11	0.9153
	94	Oryx at time=02/03/2002	-4.1017	0.3823	1073	-10.73	<0.0001
	95	Oryx at time=01/05/2015	-3.7291	0.3719	1073	-10.03	<0.0001
	96	Diff for Oryx at time= 02/03/2002 vs time= 01/05/2015	0.3726	0.5408	1073	0.69	0.4909
	97	Ostrich at time=01/03/1996	-3.0142	0.3548	1073	-8.49	<0.0001
	98	Ostrich at time=01/05/2015	-3.6186	0.3897	1073	-9.28	<0.0001
	99	Diff for Ostrich at time=01/03/1996 vs time= 01/05/2015	-0.6044	0.5229	1073	-1.16	0.248
	100	Porcupine at time=02/09/2002	-4.455	0.4651	1073	-9.58	<0.0001
	101	Porcupine at time=01/05/2015	-5.0956	0.4558	1073	-11.18	<0.0001
	102	Diff for Porcupine at time=02/09/2002 vs time= 01/05/2015	-0.6406	0.6513	1073	-0.98	0.3255
	103	Reedbuck at time=01/03/1996	-2.3019	0.3568	1073	-6.45	<0.0001
	104	Reedbuck at time=01/05/2015	-1.1087	0.4039	1073	-2.74	0.0062
	105	Diff for Reedbuck at time=01/03/1996 vs time= 01/05/2015	1.1932	0.5323	1073	2.24	0.0252
	106	Rock hyrax at time=02/03/2002	-2.1341	0.3383	1073	-6.31	<0.0001
	107	Rock hyrax at time=01/05/2015	-0.1883	0.4242	1073	-0.44	0.6572
	108	Diff for Rock hyrax at time=02/03/2002 vs time= 01/05/2015	1.9458	0.5521	1073	3.52	0.0004
	109	Serval cat at time=01/03/1996	-4.5697	0.4593	1073	-9.95	<0.0001
	110	Serval cat at time=01/05/2015	-4.0928	0.4148	1073	-9.87	<0.0001
	111	Diff for Serval cat at time=01/03/1996 vs time= 01/05/2015	0.4769	0.6098	1073	0.78	0.4343
	112	Spring hare at time=02/03/2002	-1.9613	0.3444	1073	-5.69	<0.0001
	113	Spring hare at time=01/05/2015	-1.749	0.3876	1073	-4.51	<0.0001
	114	Diff for Spring hare at time=02/03/2002 vs time= 01/05/2015	0.2123	0.5245	1073	0.4	0.6857
	115	Steinbuck at time=01/03/1996	-2.9929	0.3798	1073	-7.88	<0.0001
	116	Steinbuck at time=01/05/2015	-4.2842	0.4142	1073	-10.34	<0.0001
	117	Diff for Steinbuck at time=01/03/1996 vs time= 01/05/2015	-1.2913	0.5552	1073	-2.33	0.0202
	118	Sykes monkey at time=01/03/1996	-2.5699	0.3614	1073	-7.11	<0.0001
	119	Sykes monkey at time=01/05/2015	-3.2492	0.428	1073	-7.59	<0.0001
	120	Diff for Sykes monkey at time=01/03/1996 vs time= 01/05/2015	-0.6793	0.5529	1073	-1.23	0.2195
	121	Thomson's gazelle at time=01/03/1996	2.1613	0.3451	1073	6.26	<0.0001
	122	Thomson's gazelle at time=01/05/2015	2.0366	0.3401	1073	5.99	<0.0001
	123	Diff for Thomson's gazelle at time=01/03/1996 vs time= 01/05/2015	-0.1248	0.4785	1073	-0.26	0.7943
	124	Topi at time=02/03/2002	-3.7879	0.3723	1073	-10.17	<0.0001
	125	Topi at time=01/05/2015	-2.4988	0.3677	1073	-6.8	<0.0001
	126	Diff for Topi at time=02/03/2002 vs time= 01/05/2015	1.2891	0.5329	1073	2.42	0.0157
	127	Vervet monkey at time=01/03/1996	-2.6368	0.4127	1073	-6.39	<0.0001
	128	Vervet monkey at time=01/05/2015	-0.4244	0.3521	1073	-1.21	0.2283
	129	Diff for Vervet monkey at time=01/03/1996 vs time= 01/05/2015	2.2123	0.5333	1073	4.15	<0.0001
	130	Warthog at time=01/03/1996	-1.4694	0.3486	1073	-4.21	<0.0001
	131	Warthog at time=01/05/2015	1.3533	0.3548	1073	3.81	0.0001
	132	Diff for Warthog at time=01/03/1996 vs time= 01/05/2015	2.8228	0.4916	1073	5.74	<0.0001
	133	Waterbuck at time=01/03/1996	-0.768	0.3619	1073	-2.12	0.034
	134	Waterbuck at time=01/05/2015	0.1523	0.3444	1073	0.44	0.6584
	135	Diff for Waterbuck at time=01/03/1996 vs time= 01/05/2015	0.9203	0.4928	1073	1.87	0.0621
	136	White rhino at time=02/03/2002	-5.2699	0.4821	1073	-10.93	<0.0001
	137	White rhino at time=01/05/2015	-4.3034	0.464	1073	-9.28	<0.0001
	138	Diff for White rhino at time=02/03/2002 vs time= 01/05/2015	0.9665	0.6761	1073	1.43	0.1531
	139	Wildebeest at time=01/10/1998	-2.3448	0.4037	1073	-5.81	<0.0001
	140	Wildebeest at time=01/05/2015	0.172	0.329	1073	0.52	0.6013
	141	Diff for Wildebeest at time=01/10/1998 vs time= 01/05/2015	2.5168	0.5171	1073	4.87	<0.0001
	142	Zebra at time=01/03/1996	2.0022	0.3529	1073	5.67	<0.0001
	143	Zebra at time=01/05/2015	2.3639	0.3421	1073	6.91	<0.0001
	144	Diff for Zebra at time=01/03/1996 vs time= 01/05/2015	0.3617	0.4857	1073	0.74	0.4566
